# Supplementary material
Source: publisher site journal article supplement (https://www.dovepress.com/article/92389)
Supplement: Supplementary file 1 [file get_supplementary_file.php]

| Location | Number | Gender | Age | Order  | Diagnosis                                   | Grade | TNM    | Type      |
|----------|--------|--------|-----|--------|---------------------------------------------|-------|--------|-----------|
| A1       | 1      | F      | 41  | Breast | Invasive ductal carcinoma                   | 1     | T3N0M0 | Malignant |
| A2       | 2      | F      | 72  | Breast | Invasive ductal carcinoma                   | 1     | T2N0M0 | Malignant |
| A3       | 3      | F      | 80  | Breast | Invasive ductal carcinoma                   | 1     | T2N1M0 | Malignant |
| A4       | 4      | F      | 49  | Breast | Invasive ductal carcinoma                   | 1     | T1N0M0 | Malignant |
| A5       | 5      | F      | 51  | Breast | Invasive ductal carcinoma                   | 1     | T2N1M0 | Malignant |
| A6       | 6      | F      | 48  | Breast | Invasive ductal carcinoma                   | 1     | T4N1M0 | Malignant |
| A7       | 7      | F      | 44  | Breast | Invasive ductal carcinoma                   | 1     | T4N1M0 | Malignant |
| A8       | 8      | F      | 37  | Breast | Invasive ductal carcinoma                   | 1     | T3N1M0 | Malignant |
| B1       | 9      | F      | 32  | Breast | Invasive ductal carcinoma                   | 2     | T3N1M0 | Malignant |
| B2       | 10     | F      | 53  | Breast | Invasive ductal carcinoma                   | 2     | T2N0M0 | Malignant |
| B3       | 11     | F      | 57  | Breast | Invasive ductal carcinoma                   | 2     | T2N1M0 | Malignant |
| B4       | 12     | F      | 39  | Breast | Invasive ductal carcinoma                   | 2     | T2N2M0 | Malignant |
| B5       | 13     | F      | 61  | Breast | Invasive ductal carcinoma                   | 2     | T3N2M0 | Malignant |
| B6       | 14     | F      | 45  | Breast | Invasive ductal carcinoma                   | 2     | T2N2M0 | Malignant |
| B7       | 15     | F      | 54  | Breast | Mixed invasive ductal and lobular carcinoma | –     | T2N1M0 | Malignant |
| B8       | 16     | F      | 52  | Breast | Invasive ductal carcinoma                   | 1     | T2N2M0 | Malignant |
| C1       | 17     | F      | 50  | Breast | Invasive ductal carcinoma                   | 2     | T2N0M0 | Malignant |
| C2       | 18     | F      | 50  | Breast | Invasive ductal carcinoma                   | 2     | T2N1M0 | Malignant |
| C3       | 19     | F      | 61  | Breast | Invasive ductal carcinoma                   | 2     | T2N2M0 | Malignant |
| C4       | 20     | F      | 39  | Breast | Invasive ductal carcinoma                   | 2     | T2N1M0 | Malignant |
| C5       | 21     | F      | 38  | Breast | Invasive ductal carcinoma                   | 2     | T2N1M0 | Malignant |
| C6       | 22     | F      | 63  | Breast | Invasive ductal carcinoma                   | 2     | T2N0M0 | Malignant |
| C7       | 23     | F      | 71  | Breast | Invasive ductal carcinoma                   | 2     | T2N1M0 | Malignant |
| C8       | 24     | F      | 63  | Breast | Invasive ductal carcinoma                   | 2     | T2N1M0 | Malignant |
| D1       | 25     | F      | 70  | Breast | Invasive ductal carcinoma                   | 2     | T4N2M1 | Malignant |
| D2       | 26     | F      | 42  | Breast | Invasive ductal carcinoma                   | 2     | T3N0M0 | Malignant |
| D3       | 27     | F      | 42  | Breast | Invasive ductal carcinoma                   | 2     | T2N1M0 | Malignant |
| D4       | 28     | F      | 52  | Breast | Invasive ductal carcinoma                   | 2     | T3N1M0 | Malignant |
| D5       | 29     | F      | 37  | Breast | Invasive ductal carcinoma                   | 2     | T2N1M0 | Malignant |
| D6       | 30     | F      | 58  | Breast | Invasive ductal carcinoma                   | 2–3   | T2N1M0 | Malignant |
| D7       | 31     | F      | 50  | Breast | Invasive ductal carcinoma                   | 2–3   | T2N0M0 | Malignant |
| D8       | 32     | F      | 45  | Breast | Invasive ductal carcinoma                   | 2–3   | T4N2M0 | Malignant |
| E1       | 33     | F      | 43  | Breast | Invasive ductal carcinoma                   | 3     | T2N1M0 | Malignant |
| E2       | 34     | F      | 40  | Breast | Invasive ductal carcinoma                   | 3     | T4N1M0 | Malignant |
| E3       | 35     | F      | 32  | Breast | Invasive ductal carcinoma                   | 3     | T4N1M0 | Malignant |
| E4       | 36     | F      | 45  | Breast | Invasive ductal carcinoma                   | 3     | T4N1M0 | Malignant |
| F1       | 41     | F      | 57  | Breast | Normal breast tissue                        | –     | –      | Normal    |
| F2       | 42     | F      | 53  | Breast | Normal breast tissue                        | –     | –      | Normal    |
| F3       | 43     | F      | 53  | Breast | Normal breast tissue                        | –     | –      | Normal    |
| F4       | 44     | F      | 54  | Breast | Normal breast tissue                        | –     | –      | Normal    |
| F5       | 45     | F      | 39  | Breast | Normal breast tissue                        | –     | –      | Normal    |
| F6       | 46     | F      | 43  | Breast | Normal breast tissue                        | –     | –      | Normal    |
| F7       | 47     | F      | 39  | Breast | Normal breast tissue                        | –     | –      | Normal    |
| F8       | 48     | F      | 50  | Breast | Normal breast tissue                        | –     | –      | Normal    |

\*\*The grade 1-3 (or I-III) in Pathology Diagnosis is equivalent to well-differentiated, moderately-differentiated or poorly differentiated, respectively, under microscope.

Grade 1 or well-differentiated: Cells appear normal and are not growing rapidly.

Grade 2 or moderately-differentiated: Cells appear slightly different than normal.

Grade 3 or poorly differentiated: Cells appear abnormal and tend to grow and spread more aggressively.

Grade 4 or undifferentiated: \*(for certain tumors), features are not significantly distinguishing to make it look any different from undifferentiated cancers which occur in other organs.

TNM grading:

T - Primary tumor

Tx - Primary tumor cannot be assessed

T0 - No evidence of primary tumor

Tis - Carcinoma in situ; intraepithelial or invasion of lamina propria

T1 - Tumor invades submucosa

T2 - Tumor invades muscularis propria

T3 - Tumor invades through muscularis propria into subserosa or into non-peritonealized pericolic or perirectal tissues.

T4 - Tumor directly invades other organs or structures and/or perforate visceral peritoneum

N - Regional lymph nodes

Nx - Regional lymph nodes cannot be assessed

N0 - No regional lymph node metastasis

N1 - Metastasis in 1 to 3 regional lymph nodes

N2 - Metastasis in 4 or more regional lymph nodes

M - Distant metastasis

Mx - Distant metastasis cannot be assessed

M0 - No distant metastasis

M1 - Distant metastasis

| Location | Number | Gender | Age | Order  | Diagnosis                                                | Grade | TNM      | Type      |
|----------|--------|--------|-----|--------|----------------------------------------------------------|-------|----------|-----------|
| A1       | 1      | F      | 32  | Cervix | Squamous cell carcinoma                                  | 1     | T1a2N1M0 | Malignant |
| A2       | 2      | F      | 32  | Cervix | Squamous cell carcinoma                                  | 1     | T1a2N1M0 | Malignant |
| A3       | 3      | F      | 45  | Cervix | Squamous cell carcinoma                                  | 1     | T1NOM0   | Malignant |
| A4       | 4      | F      | 45  | Cervix | Squamous cell carcinoma                                  | –     | T1NOM0   | Malignant |
| A5       | 5      | F      | 35  | Cervix | Squamous cell carcinoma                                  | 2     | T1NOM0   | Malignant |
| A6       | 6      | F      | 35  | Cervix | Squamous cell carcinoma                                  | 2     | T1NOM0   | Malignant |
| A7       | 7      | F      | 43  | Cervix | Squamous cell carcinoma                                  | 2     | T1NOM0   | Malignant |
| A8       | 8      | F      | 43  | Cervix | Squamous cell carcinoma                                  | 2     | T1NOM0   | Malignant |
| A9       | 9      | F      | 33  | Cervix | Squamous cell carcinoma                                  | 2     | T1NOM0   | Malignant |
| A10      | 10     | F      | 33  | Cervix | Squamous cell carcinoma                                  | 2     | T1NOM0   | Malignant |
| B1       | 11     | F      | 38  | Cervix | Squamous cell carcinoma                                  | 2     | T1NOM0   | Malignant |
| B2       | 12     | F      | 38  | Cervix | Squamous cell carcinoma                                  | 2     | T1NOM0   | Malignant |
| B3       | 13     | F      | 55  | Cervix | Squamous cell carcinoma                                  | 2     | T1NOM0   | Malignant |
| B4       | 14     | F      | 55  | Cervix | Squamous cell carcinoma                                  | 2     | T1NOM0   | Malignant |
| B5       | 15     | F      | 37  | Cervix | Squamous cell carcinoma                                  | 2     | T1NOM0   | Malignant |
| B6       | 16     | F      | 37  | Cervix | Squamous cell carcinoma                                  | 2     | T1NOM0   | Malignant |
| B7       | 17     | F      | 74  | Cervix | Squamous cell carcinoma                                  | 2     | T1N1M0   | Malignant |
| B8       | 18     | F      | 74  | Cervix | Squamous cell carcinoma                                  | 2     | T1N1M0   | Malignant |
| B9       | 19     | F      | 42  | Cervix | Squamous cell carcinoma                                  | 2     | T1NOM0   | Malignant |
| B10      | 20     | F      | 42  | Cervix | Squamous cell carcinoma                                  | 2     | T1NOM0   | Malignant |
| C1       | 21     | F      | 55  | Cervix | Squamous cell carcinoma                                  | 2     | T1NOM0   | Malignant |
| C2       | 22     | F      | 55  | Cervix | Squamous cell carcinoma                                  | 2     | T1NOM0   | Malignant |
| C3       | 23     | F      | 37  | Cervix | Squamous cell carcinoma                                  | 2     | T3NOM0   | Malignant |
| C4       | 24     | F      | 37  | Cervix | Squamous cell carcinoma                                  | 2     | T3NOM0   | Malignant |
| C5       | 25     | F      | 39  | Cervix | Squamous cell carcinoma                                  | 2     | T1NOM0   | Malignant |
| C6       | 26     | F      | 39  | Cervix | Squamous cell carcinoma                                  | 2     | T1NOM0   | Malignant |
| C7       | 27     | F      | 52  | Cervix | Squamous cell carcinoma                                  | –     | T1b1N1M0 | Malignant |
| C8       | 28     | F      | 52  | Cervix | Squamous cell carcinoma                                  | –     | T1b1N1M0 | Malignant |
| C9       | 29     | F      | 36  | Cervix | Squamous cell carcinoma                                  | 2     | T1b1NOM0 | Malignant |
| C10      | 30     | F      | 36  | Cervix | Squamous cell carcinoma                                  | 2     | T1b1NOM0 | Malignant |
| D1       | 31     | F      | 41  | Cervix | Squamous cell carcinoma                                  | 2     | T1bNOM0  | Malignant |
| D2       | 32     | F      | 41  | Cervix | Squamous cell carcinoma                                  | 2     | T1bNOM0  | Malignant |
| D3       | 33     | F      | 48  | Cervix | Squamous cell carcinoma                                  | 2     | T1b1NOM0 | Malignant |
| D4       | 34     | F      | 48  | Cervix | Squamous cell carcinoma                                  | 2     | T1b1NOM0 | Malignant |
| D5       | 35     | F      | 43  | Cervix | Squamous cell carcinoma                                  | 2     | T1a2N1M0 | Malignant |
| D6       | 36     | F      | 43  | Cervix | Squamous cell carcinoma                                  | 2     | T1a2N1M0 | Malignant |
| D7       | 37     | F      | 41  | Cervix | Squamous cell carcinoma                                  | 2     | T1b1NOM0 | Malignant |
| D8       | 38     | F      | 41  | Cervix | Squamous cell carcinoma                                  | 2     | T1b1NOM0 | Malignant |
| D9       | 39     | F      | 39  | Cervix | Squamous cell carcinoma                                  | 2     | T1b2NOM0 | Malignant |
| D10      | 40     | F      | 39  | Cervix | Squamous cell carcinoma                                  | 2     | T1b2NOM0 | Malignant |
| E1       | 41     | F      | 77  | Cervix | Squamous cell carcinoma                                  | 2     | T3NOM0   | Malignant |
| E2       | 42     | F      | 77  | Cervix | Squamous cell carcinoma                                  | 2     | T3NOM0   | Malignant |
| E3       | 43     | F      | 27  | Cervix | Squamous cell carcinoma (blood vessel and smooth muscle) | –     | T1N1M0   | Malignant |
| E4       | 44     | F      | 27  | Cervix | Squamous cell carcinoma (sparse)                         | –     | T1N1M0   | Malignant |
| E5       | 45     | F      | 52  | Cervix | Squamous cell carcinoma                                  | 3     | T1NOM0   | Malignant |
| E6       | 46     | F      | 52  | Cervix | Squamous cell carcinoma                                  | 3     | T1NOM0   | Malignant |
| E7       | 47     | F      | 37  | Cervix | Squamous cell carcinoma                                  | 3     | T1N1M0   | Malignant |
| E8       | 48     | F      | 37  | Cervix | Squamous cell carcinoma                                  | 3     | T1N1M0   | Malignant |
| E9       | 49     | F      | 41  | Cervix | Squamous cell carcinoma                                  | 3     | T1b1N1M0 | Malignant |
| E10      | 50     | F      | 41  | Cervix | Squamous cell carcinoma                                  | 3     | T1b1N1M0 | Malignant |

|     |    |   |    |        |                                                         |   |        |           |
|-----|----|---|----|--------|---------------------------------------------------------|---|--------|-----------|
| F1  | 51 | F | 39 | Cervix | Squamous cell carcinoma                                 | 3 | T1N1M0 | Malignant |
| F2  | 52 | F | 39 | Cervix | Squamous cell carcinoma                                 | 3 | T1N1M0 | Malignant |
| H1  | 71 | F | 21 | Cervix | Normal cervical tissue (blood vessel and smooth muscle) | – | –      | Normal    |
| H2  | 72 | F | 21 | Cervix | Normal cervical canals tissue (sparse)                  | – | –      | Normal    |
| H3  | 73 | F | 21 | Cervix | Normal cervical tissue                                  | – | –      | Normal    |
| H4  | 74 | F | 21 | Cervix | Normal cervical tissue                                  | – | –      | Normal    |
| H5  | 75 | F | 21 | Cervix | Normal cervical tissue                                  | – | –      | Normal    |
| H6  | 76 | F | 21 | Cervix | Normal cervical tissue                                  | – | –      | Normal    |
| H7  | 77 | F | 21 | Cervix | Normal cervical tissue                                  | – | –      | Normal    |
| H8  | 78 | F | 21 | Cervix | Normal cervical tissue (sparse)                         | – | –      | Normal    |
| H9  | 79 | F | 41 | Cervix | Normal cervical canals tissue                           | – | –      | Normal    |
| H10 | 80 | F | 41 | Cervix | Normal cervical canals tissue                           | – | –      | Normal    |

---

| Location | Number | Gender | Age | Order | Diagnosis               | Grade | TNM    | Type      |
|----------|--------|--------|-----|-------|-------------------------|-------|--------|-----------|
| A1       | 1      | M      | 52  | Colon | Pillpary adenocarcinoma | 1     | T2N0M0 | Malignant |
| A2       | 2      | M      | 52  | Colon | Adenocarcinoma          | 1     | T2N0M0 | Malignant |
| A3       | 3      | M      | 67  | Colon | Adenocarcinoma          | 1     | T2N0M0 | Malignant |
| A4       | 4      | M      | 67  | Colon | Adenocarcinoma          | 1     | T2N0M0 | Malignant |
| A5       | 5      | F      | 39  | Colon | Adenocarcinoma          | 1     | T2N1M0 | Malignant |
| A6       | 6      | F      | 39  | Colon | Adenocarcinoma          | 1     | T2N1M0 | Malignant |
| A7       | 7      | F      | 76  | Colon | Adenocarcinoma          | 2     | T3N1M0 | Malignant |
| A8       | 8      | F      | 76  | Colon | Adenocarcinoma          | 2     | T3N1M0 | Malignant |
| B1       | 9      | M      | 68  | Colon | Adenocarcinoma          | 2     | T3N1M0 | Malignant |
| B2       | 10     | M      | 68  | Colon | Adenocarcinoma          | 2     | T3N1M0 | Malignant |
| B3       | 11     | M      | 32  | Colon | Adenocarcinoma          | 2     | T3N0M0 | Malignant |
| B4       | 12     | M      | 32  | Colon | Adenocarcinoma          | 2     | T3N0M0 | Malignant |
| B5       | 13     | F      | 53  | Colon | Adenocarcinoma          | 2     | T3N2M0 | Malignant |
| B6       | 14     | F      | 53  | Colon | Adenocarcinoma          | 2     | T3N2M0 | Malignant |
| B7       | 15     | M      | 55  | Colon | Adenocarcinoma          | 2     | T3N1M0 | Malignant |
| B8       | 16     | M      | 55  | Colon | Adenocarcinoma          | 2     | T3N1M0 | Malignant |
| C1       | 17     | M      | 68  | Colon | Adenocarcinoma          | 1 – 2 | T3N1M0 | Malignant |
| C2       | 18     | M      | 68  | Colon | Adenocarcinoma          | 1 – 2 | T3N1M0 | Malignant |
| C3       | 19     | M      | 77  | Colon | Adenocarcinoma          | 2     | T4N0M0 | Malignant |
| C4       | 20     | M      | 77  | Colon | Adenocarcinoma          | 2     | T4N0M0 | Malignant |
| C5       | 21     | M      | 72  | Colon | Adenocarcinoma          | 2     | T3N0M0 | Malignant |
| C6       | 22     | M      | 72  | Colon | Adenocarcinoma          | 2     | T3N0M0 | Malignant |
| C7       | 23     | M      | 52  | Colon | Adenocarcinoma          | 2     | T2N0M0 | Malignant |
| C8       | 24     | M      | 52  | Colon | Adenocarcinoma          | 2     | T2N0M0 | Malignant |
| D1       | 25     | M      | 72  | Colon | Mucinous adenocarcinoma | 2     | T3N1M2 | Malignant |
| D2       | 26     | M      | 72  | Colon | Mucinous adenocarcinoma | 2     | T3N1M2 | Malignant |
| D3       | 27     | M      | 62  | Colon | Adenocarcinoma          | 2     | T2N0M0 | Malignant |
| D4       | 28     | M      | 62  | Colon | Adenocarcinoma          | 2     | T2N0M0 | Malignant |
| D5       | 29     | F      | 51  | Colon | Adenocarcinoma          | 2     | T2N0M0 | Malignant |
| D6       | 30     | F      | 51  | Colon | Adenocarcinoma          | 2     | T2N0M0 | Malignant |
| D7       | 31     | M      | 71  | Colon | Adenocarcinoma          | 3     | T2N0M0 | Malignant |
| 3        | 32     | M      | 71  | Colon | Adenocarcinoma          | 2     | T2N0M0 | Malignant |
| E1       | 33     | F      | 67  | Colon | Adenocarcinoma          | 3     | T3N1M1 | Malignant |
| E2       | 34     | F      | 67  | Colon | Adenocarcinoma          | 3     | T3N1M1 | Malignant |
| E3       | 35     | F      | 68  | Colon | Adenocarcinoma          | 3     | T3N0M0 | Malignant |
| E4       | 36     | F      | 68  | Colon | Adenocarcinoma          | 3     | T3N0M0 | Malignant |
| F1       | 41     | M      | 56  | Colon | Normal colon tissue     | –     | –      | Normal    |
| F2       | 42     | M      | 56  | Colon | Normal colon tissue     | –     | –      | Normal    |
| F3       | 43     | M      | 30  | Colon | Normal colon tissue     | –     | –      | Normal    |
| F4       | 44     | M      | 30  | Colon | Normal colon tissue     | –     | –      | Normal    |
| F5       | 45     | M      | 28  | Colon | Normal colon tissue     | –     | –      | Normal    |
| F6       | 46     | M      | 28  | Colon | Normal colon tissue     | –     | –      | Normal    |
| F7       | 47     | M      | 30  | Colon | Normal colon tissue     | –     | –      | Normal    |
| F8       | 48     | M      | 30  | Colon | Normal colon tissue     | –     | –      | Normal    |

| Location | Number | Gender | Age | Order     | Diagnosis               | Grade | TNM    | Type      |
|----------|--------|--------|-----|-----------|-------------------------|-------|--------|-----------|
| A1       | 1      | F      | 68  | Esophagus | Squamous cell carcinoma | 2     | T3N0M0 | Malignant |
| A2       | 2      | F      | 68  | Esophagus | Squamous cell carcinoma | 2     | T3N0M0 | Malignant |
| A3       | 3      | F      | 68  | Esophagus | Squamous cell carcinoma | 2     | T3N0M0 | Malignant |
| A4       | 4      | M      | 52  | Esophagus | Squamous cell carcinoma | 2     | T2N1M0 | Malignant |
| A5       | 5      | M      | 52  | Esophagus | Squamous cell carcinoma | 2     | T2N1M0 | Malignant |
| A6       | 6      | M      | 52  | Esophagus | Squamous cell carcinoma | 2     | T2N1M0 | Malignant |
| A7       | 7      | M      | 55  | Esophagus | Squamous cell carcinoma | –     | T2N1M0 | Malignant |
| A8       | 8      | M      | 55  | Esophagus | Squamous cell carcinoma | –     | T2N1M0 | Malignant |
| A9       | 9      | M      | 55  | Esophagus | Squamous cell carcinoma | –     | T2N1M0 | Malignant |
| B1       | 10     | M      | 55  | Esophagus | Squamous cell carcinoma | 1     | T2N1M0 | Malignant |
| B2       | 11     | M      | 55  | Esophagus | Squamous cell carcinoma | 1     | T2N1M0 | Malignant |
| B3       | 12     | M      | 55  | Esophagus | Squamous cell carcinoma | 1     | T2N1M0 | Malignant |
| B4       | 13     | M      | 57  | Esophagus | Squamous cell carcinoma | 1     | T3N0M0 | Malignant |
| B5       | 14     | M      | 57  | Esophagus | Squamous cell carcinoma | 1     | T3N0M0 | Malignant |
| B6       | 15     | M      | 57  | Esophagus | Squamous cell carcinoma | 1     | T3N0M0 | Malignant |
| B7       | 16     | M      | 52  | Esophagus | Squamous cell carcinoma | 1     | T3N0M0 | Malignant |
| B8       | 17     | M      | 52  | Esophagus | Squamous cell carcinoma | 1     | T3N0M0 | Malignant |
| B9       | 18     | M      | 52  | Esophagus | Squamous cell carcinoma | 1     | T3N0M0 | Malignant |
| C1       | 19     | M      | 50  | Esophagus | Squamous cell carcinoma | 2     | T3N1M0 | Malignant |
| C2       | 20     | M      | 50  | Esophagus | Squamous cell carcinoma | 2     | T3N1M0 | Malignant |
| C3       | 21     | M      | 50  | Esophagus | Squamous cell carcinoma | 2     | T3N1M0 | Malignant |
| C4       | 22     | M      | 65  | Esophagus | Squamous cell carcinoma | 1     | T3N0M0 | Malignant |
| C5       | 23     | M      | 65  | Esophagus | Squamous cell carcinoma | 1     | T3N0M0 | Malignant |
| C6       | 24     | M      | 65  | Esophagus | Squamous cell carcinoma | 1     | T3N0M0 | Malignant |
| C7       | 25     | F      | 63  | Esophagus | Squamous cell carcinoma | 2     | T3N1M0 | Malignant |
| C8       | 26     | F      | 63  | Esophagus | Squamous cell carcinoma | 2     | T3N1M0 | Malignant |
| C9       | 27     | F      | 63  | Esophagus | Squamous cell carcinoma | 2     | T3N1M0 | Malignant |
| D1       | 28     | M      | 58  | Esophagus | Squamous cell carcinoma | 2     | T2N2M0 | Malignant |
| D2       | 29     | M      | 58  | Esophagus | Squamous cell carcinoma | 2     | T2N2M0 | Malignant |
| D3       | 30     | M      | 58  | Esophagus | Squamous cell carcinoma | 2     | T2N2M0 | Malignant |
| D4       | 31     | M      | 54  | Esophagus | Squamous cell carcinoma | 1     | T2N0M0 | Malignant |
| D5       | 32     | M      | 54  | Esophagus | Squamous cell carcinoma | 1     | T2N0M0 | Malignant |
| D6       | 33     | M      | 54  | Esophagus | Squamous cell carcinoma | 1     | T2N0M0 | Malignant |
| D7       | 34     | M      | 64  | Esophagus | Squamous cell carcinoma | 1     | T3N0M0 | Malignant |
| D8       | 35     | M      | 64  | Esophagus | Squamous cell carcinoma | 2     | T3N0M0 | Malignant |
| D9       | 36     | M      | 64  | Esophagus | Squamous cell carcinoma | 2     | T3N0M0 | Malignant |
| E1       | 37     | F      | 58  | Esophagus | Squamous cell carcinoma | 2     | T3N1M0 | Malignant |
| E2       | 38     | F      | 58  | Esophagus | Squamous cell carcinoma | 2     | T3N1M0 | Malignant |
| E3       | 39     | F      | 58  | Esophagus | Squamous cell carcinoma | 2     | T3N1M0 | Malignant |
| E4       | 40     | F      | 57  | Esophagus | Squamous cell carcinoma | 2     | T3N1M0 | Malignant |
| E5       | 41     | F      | 57  | Esophagus | Squamous cell carcinoma | 2     | T3N1M0 | Malignant |
| E6       | 42     | F      | 57  | Esophagus | Squamous cell carcinoma | 2     | T3N1M0 | Malignant |
| E7       | 43     | M      | 58  | Esophagus | Squamous cell carcinoma | 3     | T2N0M0 | Malignant |
| E8       | 44     | M      | 58  | Esophagus | Squamous cell carcinoma | 3     | T2N0M0 | Malignant |
| E9       | 45     | M      | 58  | Esophagus | Squamous cell carcinoma | 3     | T2N0M0 | Malignant |
| F1       | 46     | M      | 50  | Esophagus | Squamous cell carcinoma | 3     | T2N0M0 | Malignant |
| F2       | 47     | M      | 50  | Esophagus | Squamous cell carcinoma | 3     | T2N0M0 | Malignant |
| F3       | 48     | M      | 50  | Esophagus | Squamous cell carcinoma | 3     | T2N0M0 | Malignant |
| F4       | 49     | F      | 53  | Esophagus | Squamous cell carcinoma | 3     | T3N1M0 | Malignant |
| F5       | 50     | F      | 53  | Esophagus | Squamous cell carcinoma | 3     | T3N1M0 | Malignant |

|    |    |   |    |           |                          |   |        |           |
|----|----|---|----|-----------|--------------------------|---|--------|-----------|
| F6 | 51 | F | 53 | Esophagus | Squamous cell carcinoma  | 3 | T3N1M0 | Malignant |
| H1 | 64 | F | 40 | Esophagus | Normal esophageal tissue | – | –      | Normal    |
| H2 | 65 | F | 40 | Esophagus | Normal esophageal tissue | – | –      | Normal    |
| H3 | 66 | F | 40 | Esophagus | Normal esophageal tissue | – | –      | Normal    |
| H4 | 67 | M | 40 | Esophagus | Normal esophageal tissue | – | –      | Normal    |
| H5 | 68 | M | 40 | Esophagus | Normal esophageal tissue | – | –      | Normal    |
| H6 | 69 | M | 40 | Esophagus | Normal esophageal tissue | – | –      | Normal    |
| H7 | 70 | F | 40 | Esophagus | Normal esophageal tissue | – | –      | Normal    |
| H8 | 71 | F | 40 | Esophagus | Normal esophageal tissue | – | –      | Normal    |
| H9 | 72 | F | 40 | Esophagus | Normal esophageal tissue | – | –      | Normal    |

---

| Location | Number | Gender | Age | Order | Diagnosis                         | Grade | TNM    | Type      |
|----------|--------|--------|-----|-------|-----------------------------------|-------|--------|-----------|
| A1       | 1      | M      | 41  | Liver | Hepatocellular carcinoma          | 1     | T2N0M0 | Malignant |
| A2       | 2      | M      | 41  | Liver | Hepatocellular carcinoma          | 1     | T2N0M0 | Malignant |
| A3       | 3      | M      | 52  | Liver | Hepatocellular carcinoma          | 1     | T2N0M0 | Malignant |
| A4       | 4      | M      | 52  | Liver | Hepatocellular carcinoma          | 1     | T2N0M0 | Malignant |
| A5       | 5      | F      | 78  | Liver | Hepatocellular carcinoma          | 2     | T3N0M0 | Malignant |
| A6       | 6      | F      | 78  | Liver | Hepatocellular carcinoma          | 2     | T3N0M0 | Malignant |
| A7       | 7      | M      | 38  | Liver | Hepatocellular carcinoma          | 1     | T2N0M0 | Malignant |
| A8       | 8      | M      | 38  | Liver | Hepatocellular carcinoma          | 1     | T2N0M0 | Malignant |
| B1       | 9      | M      | 49  | Liver | Hepatocellular carcinoma          | 2     | T2N0M0 | Malignant |
| B2       | 10     | M      | 49  | Liver | Hepatocellular carcinoma          | 2     | T2N0M0 | Malignant |
| B3       | 11     | M      | 60  | Liver | Hepatocellular carcinoma          | 2     | T3N0M0 | Malignant |
| B4       | 12     | M      | 60  | Liver | Hepatocellular carcinoma          | 2     | T3N0M0 | Malignant |
| B5       | 13     | M      | 47  | Liver | Hepatocellular carcinoma          | 1     | T3N0M0 | Malignant |
| B6       | 14     | M      | 47  | Liver | Hepatocellular carcinoma (sparse) | 1     | T3N0M0 | Malignant |
| B7       | 15     | M      | 61  | Liver | Hepatocellular carcinoma          | 1     | T2N0M0 | Malignant |
| B8       | 16     | M      | 61  | Liver | Hepatocellular carcinoma          | 1     | T2N0M0 | Malignant |
| C1       | 17     | M      | 62  | Liver | Hepatocellular carcinoma          | 2     | T3N0M0 | Malignant |
| C2       | 18     | M      | 62  | Liver | Hepatocellular carcinoma          | 2     | T3N0M0 | Malignant |
| C3       | 19     | M      | 31  | Liver | Hepatocellular carcinoma          | 2     | T3N0M0 | Malignant |
| C4       | 20     | M      | 31  | Liver | Hepatocellular carcinoma          | 2     | T3N0M0 | Malignant |
| C5       | 21     | M      | 43  | Liver | Hepatocellular carcinoma          | 2     | T2N0M0 | Malignant |
| C6       | 22     | M      | 43  | Liver | Hepatocellular carcinoma          | 2     | T2N0M0 | Malignant |
| C7       | 23     | M      | 59  | Liver | Hepatocellular carcinoma          | 2     | T2N0M0 | Malignant |
| C8       | 24     | M      | 59  | Liver | Hepatocellular carcinoma          | 2     | T2N0M0 | Malignant |
| D1       | 25     | F      | 60  | Liver | Hepatocellular carcinoma          | 3     | T2N0M0 | Malignant |
| D2       | 26     | F      | 60  | Liver | Hepatocellular carcinoma          | 3     | T2N0M0 | Malignant |
| D3       | 27     | M      | 38  | Liver | Hepatocellular carcinoma          | 2     | T3N0M0 | Malignant |
| D4       | 28     | M      | 38  | Liver | Hepatocellular carcinoma          | 2     | T3N0M0 | Malignant |
| D5       | 29     | M      | 49  | Liver | Hepatocellular carcinoma          | 3     | T3N0M0 | Malignant |
| D6       | 30     | M      | 49  | Liver | Hepatocellular carcinoma          | 3     | T3N0M0 | Malignant |
| D7       | 31     | M      | 26  | Liver | Hepatocellular carcinoma          | 3     | T3N0M0 | Malignant |
| D8       | 32     | M      | 26  | Liver | Hepatocellular carcinoma          | 3     | T3N0M0 | Malignant |
| E1       | 33     | M      | 48  | Liver | Hepatocellular carcinoma          | 2     | T3N1M0 | Malignant |
| E2       | 34     | M      | 48  | Liver | Hepatocellular carcinoma          | 2     | T3N1M0 | Malignant |
| E3       | 35     | M      | 64  | Liver | Hepatocellular carcinoma          | 3     | T3N0M0 | Malignant |
| E4       | 36     | M      | 64  | Liver | Hepatocellular carcinoma          | 3     | T3N0M0 | Malignant |
| E5       | 37     | F      | 53  | Liver | Hepatocellular carcinoma          | 3     | T2N0M0 | Malignant |
| E6       | 38     | F      | 53  | Liver | Hepatocellular carcinoma          | 3     | T2N0M0 | Malignant |
| F1       | 41     | M      | 16  | Liver | Normal hepatic tissue             | –     | –      | Normal    |
| F2       | 42     | M      | 16  | Liver | Normal hepatic tissue             | –     | –      | Normal    |
| F3       | 43     | M      | 40  | Liver | Normal hepatic tissue             | –     | –      | Normal    |
| F4       | 44     | M      | 40  | Liver | Normal hepatic tissue             | –     | –      | Normal    |
| F5       | 45     | F      | 50  | Liver | Normal hepatic tissue             | –     | –      | Normal    |
| F6       | 46     | F      | 50  | Liver | Normal hepatic tissue             | –     | –      | Normal    |
| F7       | 47     | M      | 35  | Liver | Normal hepatic tissue             | –     | –      | Normal    |
| F8       | 48     | M      | 35  | Liver | Normal hepatic tissue             | –     | –      | Normal    |



| Location | Number | Gender | Age | Order | Diagnosis                                                          | Grade | TNM    | Type      |
|----------|--------|--------|-----|-------|--------------------------------------------------------------------|-------|--------|-----------|
| A1       | 1      | M      | 51  | Lung  | Squamous cell carcinoma                                            | 1     | T2NxM0 | Malignant |
| A10      | 10     | M      | 68  | Lung  | Squamous cell carcinoma                                            | 1     | T2N1M0 | Malignant |
| A2       | 2      | M      | 46  | Lung  | Squamous cell carcinoma                                            | 1     | T2NxM0 | Malignant |
| A3       | 3      | M      | 49  | Lung  | Squamous cell carcinoma                                            | 2     | T2N1M0 | Malignant |
| A4       | 4      | M      | 62  | Lung  | Squamous cell carcinoma                                            | 2     | T2N1M0 | Malignant |
| A5       | 5      | F      | 59  | Lung  | Squamous cell carcinoma                                            | 2     | T3N2M0 | Malignant |
| A6       | 6      | M      | 69  | Lung  | Squamous cell carcinoma                                            | 2     | T2N1M0 | Malignant |
| A7       | 7      | M      | 55  | Lung  | Squamous cell carcinoma (sparse)                                   | –     | T2N1M0 | Malignant |
| A8       | 8      | M      | 57  | Lung  | Squamous cell carcinoma                                            | 1     | T2N1M0 | Malignant |
| A9       | 9      | M      | 46  | Lung  | Squamous cell carcinoma                                            | 1     | T3N1M0 | Malignant |
| B1       | 11     | M      | 70  | Lung  | Squamous cell carcinoma                                            | 1     | T2N0M0 | Malignant |
| B10      | 20     | M      | 51  | Lung  | Squamous cell carcinoma                                            | 2     | T2N1M0 | Malignant |
| B2       | 12     | M      | 46  | Lung  | Squamous cell carcinoma                                            | 1     | T2N1M0 | Malignant |
| B3       | 13     | M      | 46  | Lung  | Squamous cell carcinoma                                            | 2     | T2N2M0 | Malignant |
| B4       | 14     | M      | 60  | Lung  | Squamous cell carcinoma                                            | 2     | T2N1M0 | Malignant |
| B5       | 15     | M      | 64  | Lung  | Squamous cell carcinoma                                            | 2     | T2N0M0 | Malignant |
| B6       | 16     | M      | 45  | Lung  | Squamous cell carcinoma (lung and chronic inflammtion of bronchus) | –     | T1N1M0 | Malignant |
| B7       | 17     | M      | 68  | Lung  | Squamous cell carcinoma                                            | 1     | T2N1M0 | Malignant |
| B8       | 18     | M      | 30  | Lung  | Squamous cell carcinoma                                            | 2     | T2N0M0 | Malignant |
| B9       | 19     | M      | 50  | Lung  | Squamous cell carcinoma                                            | 2     | T2N0M0 | Malignant |
| C1       | 21     | M      | 72  | Lung  | Squamous cell carcinoma                                            | 2–3   | T2N1M0 | Malignant |
| C2       | 22     | M      | 64  | Lung  | Squamous cell carcinoma                                            | 2     | T2N1M0 | Malignant |
| C3       | 23     | F      | 55  | Lung  | Squamous cell carcinoma                                            | 3     | T2N1M0 | Malignant |
| C4       | 24     | M      | 30  | Lung  | Squamous cell carcinoma                                            | 2     | T2N0M0 | Malignant |
| C5       | 25     | M      | 77  | Lung  | Squamous cell carcinoma                                            | 3     | T3N2M0 | Malignant |
| C6       | 26     | M      | 51  | Lung  | Squamous cell carcinoma                                            | 3     | T4N0M0 | Malignant |
| C7       | 27     | M      | 66  | Lung  | Squamous cell carcinoma                                            | 2     | T2N0M0 | Malignant |
| E6       | 46     | M      | 24  | Lung  | Normal pulmonary tissue                                            | –     | –      | Normal    |
| E7       | 47     | M      | 49  | Lung  | Normal pulmonary tissue                                            | –     | –      | Normal    |
| E8       | 48     | M      | 55  | Lung  | Normal pulmonary tissue                                            | –     | –      | Normal    |
| E9       | 49     | M      | 50  | Lung  | Normal pulmonary tissue                                            | –     | –      | Normal    |

| Location | Number | Gender | Age | Organ | Diagnosis                       | Grade | TNM     | Type      |
|----------|--------|--------|-----|-------|---------------------------------|-------|---------|-----------|
| A1       | 1      | F      | 68  | Ovary | Serous papillary adenocarcinoma | 2     | T1N0M0  | Malignant |
| A2       | 2      | F      | 68  | Ovary | Serous papillary adenocarcinoma | 2     | T1N0M0  | Malignant |
| A3       | 3      | F      | 30  | Ovary | Serous papillary adenocarcinoma | 1     | T1N0M0  | Malignant |
| A4       | 4      | F      | 30  | Ovary | Serous papillary adenocarcinoma | 1     | T1N0M0  | Malignant |
| A5       | 5      | F      | 40  | Ovary | Serous papillary adenocarcinoma | 1     | T1N0M0  | Malignant |
| A6       | 6      | F      | 40  | Ovary | Serous papillary adenocarcinoma | 1     | T1N0M0  | Malignant |
| A7       | 7      | F      | 46  | Ovary | Serous papillary adenocarcinoma | 1     | T4NXM3  | Malignant |
| A8       | 8      | F      | 46  | Ovary | Serous papillary adenocarcinoma | 1     | T4NXM3  | Malignant |
| A9       | 9      | F      | 34  | Ovary | Serous papillary adenocarcinoma | 1     | T1aN0M0 | Malignant |
| A10      | 10     | F      | 34  | Ovary | Serous papillary adenocarcinoma | 1     | T1aN0M0 | Malignant |
| B1       | 11     | F      | 38  | Ovary | Serous papillary adenocarcinoma | 1     | T3cN1M1 | Malignant |
| B2       | 12     | F      | 38  | Ovary | Serous papillary adenocarcinoma | 1     | T3cN1M1 | Malignant |
| B3       | 13     | F      | 34  | Ovary | Serous papillary adenocarcinoma | 1     | T1aN0M0 | Malignant |
| B4       | 14     | F      | 34  | Ovary | Serous papillary adenocarcinoma | 1     | T1aN0M0 | Malignant |
| B5       | 15     | F      | 60  | Ovary | Serous papillary adenocarcinoma | 1     | T2N0M0  | Malignant |
| B6       | 16     | F      | 60  | Ovary | Serous papillary adenocarcinoma | 1     | T2N0M0  | Malignant |
| B7       | 17     | F      | 47  | Ovary | Serous papillary adenocarcinoma | 1     | T1N0M0  | Malignant |
| B8       | 18     | F      | 47  | Ovary | Serous papillary adenocarcinoma | 1     | T1N0M0  | Malignant |
| B9       | 19     | F      | 56  | Ovary | Serous papillary adenocarcinoma | 2     | T3cN1M1 | Malignant |
| B10      | 20     | F      | 56  | Ovary | Serous papillary adenocarcinoma | 2     | T3cN1M1 | Malignant |
| C1       | 21     | F      | 57  | Ovary | Serous papillary adenocarcinoma | 2     | T1cN0M0 | Malignant |
| C2       | 22     | F      | 57  | Ovary | Serous papillary adenocarcinoma | 2     | T1cN0M0 | Malignant |
| C3       | 23     | F      | 54  | Ovary | Serous papillary adenocarcinoma | 2     | T3cN1M0 | Malignant |
| C4       | 24     | F      | 54  | Ovary | Serous papillary adenocarcinoma | 2     | T3cN1M0 | Malignant |
| C5       | 25     | F      | 43  | Ovary | Serous papillary adenocarcinoma | 2     | T1N0M0  | Malignant |
| C6       | 26     | F      | 43  | Ovary | Serous papillary adenocarcinoma | 2     | T1N0M0  | Malignant |
| C7       | 27     | F      | 51  | Ovary | Serous papillary adenocarcinoma | 2     | T3N1M1  | Malignant |
| C8       | 28     | F      | 51  | Ovary | Serous papillary adenocarcinoma | 2     | T3N1M1  | Malignant |
| C9       | 29     | F      | 40  | Ovary | Serous adenocarcinoma (sparse)  | –     | T4N1M1  | Malignant |
| C10      | 30     | F      | 40  | Ovary | Serous papillary adenocarcinoma | 2     | T4N1M1  | Malignant |
| D1       | 31     | F      | 50  | Ovary | Serous papillary adenocarcinoma | 2     | T1N0M0  | Malignant |
| D2       | 32     | F      | 50  | Ovary | Serous papillary adenocarcinoma | 2     | T1N0M0  | Malignant |
| D3       | 33     | F      | 49  | Ovary | Serous papillary adenocarcinoma | 3     | T2N0M0  | Malignant |
| D4       | 34     | F      | 49  | Ovary | Serous papillary adenocarcinoma | 3     | T2N0M0  | Malignant |
| D5       | 35     | F      | 39  | Ovary | Serous papillary adenocarcinoma | 2     | T1aN0M0 | Malignant |
| D6       | 36     | F      | 39  | Ovary | Serous papillary adenocarcinoma | 2     | T1aN0M0 | Malignant |
| D7       | 37     | F      | 60  | Ovary | Serous papillary adenocarcinoma | 2     | T2N0M0  | Malignant |
| D8       | 38     | F      | 60  | Ovary | Serous papillary adenocarcinoma | 2     | T2N0M0  | Malignant |
| D9       | 39     | F      | 53  | Ovary | Serous papillary adenocarcinoma | 3     | T3N1M0  | Malignant |
| D10      | 40     | F      | 53  | Ovary | Serous papillary adenocarcinoma | 3     | T3N1M0  | Malignant |
| H1       | 71     | F      | 20  | Ovary | Normal ovarian tissue           | –     | –       | Normal    |
| H2       | 72     | F      | 20  | Ovary | Normal ovarian tissue           | –     | –       | Normal    |
| H3       | 73     | F      | 15  | Ovary | Normal ovarian tissue           | –     | –       | Normal    |
| H4       | 74     | F      | 15  | Ovary | Normal ovarian tissue           | –     | –       | Normal    |
| H5       | 75     | F      | 18  | Ovary | Normal ovarian tissue           | –     | –       | Normal    |
| H6       | 76     | F      | 18  | Ovary | Normal ovarian tissue           | –     | –       | Normal    |
| H7       | 77     | F      | 41  | Ovary | Normal ovarian tissue           | –     | –       | Normal    |
| H8       | 78     | F      | 41  | Ovary | Normal ovarian tissue           | –     | –       | Normal    |
| H9       | 79     | F      | 40  | Ovary | Normal ovarian tissue           | –     | –       | Normal    |
| H10      | 80     | F      | 40  | Ovary | Normal ovarian tissue           | –     | –       | Normal    |

| Location | Number | Gender | Age | Organ  | Diagnosis                | Grade | TNM    | Type      |
|----------|--------|--------|-----|--------|--------------------------|-------|--------|-----------|
| A1       | 1      | F      | 46  | Rectum | Adenocarcinoma           | 1     | T2N1M0 | Malignant |
| A2       | 2      | M      | 53  | Rectum | Mucinous adenocarcinoma  | 1     | T2N0M0 | Malignant |
| A3       | 3      | M      | 40  | Rectum | Papillary adenocarcinoma | 1     | T3N0M0 | Malignant |
| A4       | 4      | F      | 54  | Rectum | Adenocarcinoma           | 1     | T2N0M0 | Malignant |
| A5       | 5      | F      | 62  | Rectum | Adenocarcinoma           | 1     | T2N0M0 | Malignant |
| A6       | 6      | F      | 33  | Rectum | Mucinous adenocarcinoma  | 2     | T3N0M0 | Malignant |
| A7       | 7      | F      | 42  | Rectum | Adenocarcinoma           | 1     | T3N2M0 | Malignant |
| A8       | 8      | F      | 67  | Rectum | Adenocarcinoma           | 2     | T2N2M0 | Malignant |
| A9       | 9      | F      | 58  | Rectum | Adenocarcinoma           | 1     | T3N1M0 | Malignant |
| A10      | 10     | F      | 74  | Rectum | Adenocarcinoma           | 1     | T3N1M0 | Malignant |
| B1       | 11     | M      | 52  | Rectum | Adenocarcinoma           | 1     | T3N0M0 | Malignant |
| B2       | 12     | F      | 56  | Rectum | Adenocarcinoma           | 2     | T4N1M0 | Malignant |
| B3       | 13     | M      | 38  | Rectum | Adenocarcinoma           | 2     | T3N1M0 | Malignant |
| B4       | 14     | M      | 72  | Rectum | Adenocarcinoma           | 2     | T3N2M0 | Malignant |
| B5       | 15     | F      | 38  | Rectum | Adenocarcinoma           | 2     | T3N2M0 | Malignant |
| B6       | 16     | F      | 34  | Rectum | Adenocarcinoma           | 2     | T3N2M0 | Malignant |
| B7       | 17     | M      | 40  | Rectum | Adenocarcinoma           | 2     | T3N2M0 | Malignant |
| B8       | 18     | M      | 53  | Rectum | Adenocarcinoma           | 2     | T3N0M0 | Malignant |
| B9       | 19     | F      | 58  | Rectum | Adenocarcinoma           | 2     | T2N0M0 | Malignant |
| B10      | 20     | M      | 60  | Rectum | Adenocarcinoma           | 2     | T3N1M0 | Malignant |
| C1       | 21     | M      | 38  | Rectum | Adenocarcinoma           | 2     | T3N1M0 | Malignant |
| C2       | 22     | F      | 50  | Rectum | Adenocarcinoma           | 2     | T2N0M0 | Malignant |
| C3       | 23     | F      | 64  | Rectum | Mucinous adenocarcinoma  | 2     | T3N0M0 | Malignant |
| C4       | 24     | M      | 71  | Rectum | Adenocarcinoma           | 2     | T3N1M0 | Malignant |
| C5       | 25     | M      | 60  | Rectum | Adenocarcinoma           | 2     | T3N1M0 | Malignant |
| C6       | 26     | F      | 38  | Rectum | Mucinous adenocarcinoma  | 3     | T2N0M0 | Malignant |
| C7       | 27     | M      | 33  | Rectum | Mucinous adenocarcinoma  | 2-3   | T3N1M0 | Malignant |
| C8       | 28     | M      | 63  | Rectum | Adenocarcinoma           | 2     | T3N1M0 | Malignant |
| C9       | 29     | F      | 54  | Rectum | Adenocarcinoma           | 2     | T3N0M0 | Malignant |
| C10      | 30     | F      | 59  | Rectum | Adenocarcinoma           | 2     | T4N2M0 | Malignant |
| D1       | 31     | M      | 69  | Rectum | Adenocarcinoma           | 2     | T4N0M0 | Malignant |
| D2       | 32     | M      | 62  | Rectum | Adenocarcinoma           | 2     | T3N1M0 | Malignant |
| D3       | 33     | M      | 51  | Rectum | Mucinous adenocarcinoma  | 2     | T2N1M1 | Malignant |
| D4       | 34     | F      | 40  | Rectum | Adenocarcinoma           | 2     | T3N0M0 | Malignant |
| D5       | 35     | M      | 59  | Rectum | Adenocarcinoma           | 1     | T2N0M0 | Malignant |
| D6       | 36     | M      | 57  | Rectum | Adenocarcinoma           | 2     | T3N1M0 | Malignant |
| D7       | 37     | F      | 33  | Rectum | Adenocarcinoma           | 2     | T3N2M0 | Malignant |
| D8       | 38     | M      | 71  | Rectum | Adenocarcinoma           | 2     | T3N2M0 | Malignant |
| D9       | 39     | F      | 52  | Rectum | Adenocarcinoma           | 2     | T3N2M0 | Malignant |
| D10      | 40     | F      | 52  | Rectum | Adenocarcinoma           | 2     | T3N2M0 | Malignant |
| E1       | 41     | M      | 55  | Rectum | Adenocarcinoma           | 2     | T3N2M0 | Malignant |
| E2       | 42     | F      | 70  | Rectum | Adenocarcinoma           | 2     | T2N0M0 | Malignant |
| E3       | 43     | F      | 29  | Rectum | Adenocarcinoma           | 2     | T3N2M0 | Malignant |
| E4       | 44     | F      | 39  | Rectum | Squamous cell carcinoma  | 2     | T3N0M0 | Malignant |
| E5       | 45     | F      | 47  | Rectum | Adenocarcinoma           | 2     | T2N2M0 | Malignant |
| E6       | 46     | F      | 64  | Rectum | Adenocarcinoma           | 2     | T1N0M0 | Malignant |
| E7       | 47     | M      | 60  | Rectum | Adenocarcinoma           | 2     | T3N0M0 | Malignant |
| E8       | 48     | M      | 59  | Rectum | Adenocarcinoma           | 2     | T2N0M0 | Malignant |
| E9       | 49     | M      | 59  | Rectum | Adenocarcinoma           | 2     | T2N0M0 | Malignant |
| E10      | 50     | F      | 53  | Rectum | Mucinous adenocarcinoma  | 2     | T3N0M0 | Malignant |

|     |    |   |    |        |                                                                                               |     |        |           |
|-----|----|---|----|--------|-----------------------------------------------------------------------------------------------|-----|--------|-----------|
| F1  | 51 | F | 52 | Rectum | Adenocarcinoma                                                                                | 2   | T2N0M0 | Malignant |
| F2  | 52 | F | 76 | Rectum | Adenocarcinoma                                                                                | 2   | T3N0M0 | Malignant |
| F3  | 53 | M | 73 | Rectum | Adenocarcinoma (sparse)                                                                       | –   | T2N0M0 | Malignant |
| F4  | 54 | M | 64 | Rectum | Adenocarcinoma                                                                                | 2   | T3N0M0 | Malignant |
| F5  | 55 | F | 41 | Rectum | Adenocarcinoma                                                                                | 2   | T3N2M0 | Malignant |
| F6  | 56 | F | 36 | Rectum | Adenocarcinoma                                                                                | 2   | T2N1M0 | Malignant |
| F7  | 57 | M | 49 | Rectum | Mucinous adenocarcinoma                                                                       | 2   | T4N0M0 | Malignant |
| F8  | 58 | M | 83 | Rectum | Adenocarcinoma                                                                                | 2   | T3N0M0 | Malignant |
| F9  | 59 | M | 62 | Rectum | Adenocarcinoma                                                                                | 2   | T2N0M0 | Malignant |
| F10 | 60 | F | 64 | Rectum | Adenocarcinoma                                                                                | 2   | T4N0M0 | Malignant |
| G1  | 61 | F | 40 | Rectum | Adenocarcinoma                                                                                | 2   | T2N1M0 | Malignant |
| G2  | 62 | M | 54 | Rectum | Adenocarcinoma                                                                                | 2   | T4N0M0 | Malignant |
| G3  | 63 | M | 27 | Rectum | Adenocarcinoma                                                                                | 2–3 | T3N2M0 | Malignant |
| G4  | 64 | M | 42 | Rectum | Adenocarcinoma                                                                                | 2–3 | T3N1M0 | Malignant |
| G5  | 65 | F | 32 | Rectum | Mucinous adenocarcinoma                                                                       | 3   | T3N0M0 | Malignant |
| G6  | 66 | M | 51 | Rectum | Adenocarcinoma                                                                                | 3   | T3N2M0 | Malignant |
| G7  | 67 | F | 49 | Rectum | Mucinous adenocarcinoma                                                                       | 3   | T2N0M0 | Malignant |
| G8  | 68 | M | 58 | Rectum | Mucinous adenocarcinoma                                                                       | 3   | T3N0M0 | Malignant |
| G9  | 69 | M | 66 | Rectum | Adenocarcinoma                                                                                | 3   | T3N0M0 | Malignant |
| G10 | 70 | F | 59 | Rectum | Adenocarcinoma (sparse)                                                                       | –   | T2N0M0 | Malignant |
| H1  | 71 | F | 58 | Rectum | Cancer adjacent normal rectal tissue of No. 9                                                 | –   | –      | NAT       |
| H2  | 72 | M | 72 | Rectum | Cancer adjacent normal rectal mucosa tissue of No. 14                                         | –   | –      | NAT       |
| H3  | 73 | F | 52 | Rectum | Cancer adjacent normal rectal tissue of No. 39                                                | –   | –      | NAT       |
| H4  | 74 | M | 64 | Rectum | Cancer adjacent normal rectal tissue of No. 54                                                | –   | –      | NAT       |
| H5  | 75 | F | 36 | Rectum | Cancer adjacent normal rectal tissue of No. 56                                                | –   | –      | NAT       |
| H6  | 76 | M | 34 | Rectum | Cancer adjacent normal rectal tissue                                                          | –   | –      | NAT       |
| H7  | 77 | F | 70 | Rectum | Cancer adjacent normal rectal tissue of No. 42                                                | –   | –      | NAT       |
| H8  | 78 | F | 64 | Rectum | Cancer adjacent normal rectal tissue (chronic inflammation of rectal tissue sparse) of No. 60 | –   | –      | NAT       |
| H9  | 79 | M | 68 | Rectum | Cancer adjacent normal rectal tissue                                                          | –   | –      | NAT       |
| H10 | 80 | M | 37 | Rectum | Cancer adjacent normal rectal tissue (chronic inflammation of rectal tissue sparse)           | –   | –      | NAT       |

| Location | Number | Gender | Age | Order   | Diagnosis                                        | Grade | TNM    | Type      |
|----------|--------|--------|-----|---------|--------------------------------------------------|-------|--------|-----------|
| A1       | 1      | M      | 64  | Stomach | Adenocarcinoma                                   | 1     | T1N0M0 | Malignant |
| A2       | 2      | M      | 66  | Stomach | Adenocarcinoma                                   | 1     | T2N0M0 | Malignant |
| A3       | 3      | M      | 39  | Stomach | Adenocarcinoma                                   | 1     | T2N0M0 | Malignant |
| A4       | 4      | M      | 37  | Stomach | Adenocarcinoma (gastric tissue)                  | –     | T1N0M0 | Malignant |
| A5       | 5      | M      | 86  | Stomach | Adenocarcinoma                                   | 2     | T2N0M0 | Malignant |
| A6       | 6      | F      | 80  | Stomach | Adenocarcinoma (fibrous tissue and blood vessel) | –     | T1N0M0 | Malignant |
| A7       | 7      | M      | 52  | Stomach | Adenocarcinoma                                   | 2     | T1N0M0 | Malignant |
| A8       | 8      | F      | 73  | Stomach | Adenocarcinoma                                   | 3     | T2N0M0 | Malignant |
| A9       | 9      | M      | 74  | Stomach | Adenocarcinoma                                   | 2     | T2N0M0 | Malignant |
| A10      | 10     | M      | 42  | Stomach | Adenocarcinoma                                   | 3     | T1N1M0 | Malignant |
| B1       | 11     | M      | 62  | Stomach | Adenocarcinoma                                   | 3     | T2N0M0 | Malignant |
| B2       | 12     | F      | 35  | Stomach | Adenocarcinoma (fibrous tissue and blood vessel) | –     | T2N0M0 | Malignant |
| B3       | 13     | M      | 61  | Stomach | Adenocarcinoma                                   | 2     | T2N0M0 | Malignant |
| B4       | 14     | M      | 50  | Stomach | Adenocarcinoma                                   | 3     | T1N0M0 | Malignant |
| B5       | 15     | F      | 63  | Stomach | Adenocarcinoma                                   | 3     | T2N0M0 | Malignant |
| B6       | 16     | M      | 65  | Stomach | Adenocarcinoma                                   | 2     | T3N1M0 | Malignant |
| B7       | 17     | M      | 62  | Stomach | Adenocarcinoma                                   | 2     | T3N1M0 | Malignant |
| B8       | 18     | M      | 66  | Stomach | Adenocarcinoma                                   | 1     | T3NxM0 | Malignant |
| B9       | 19     | F      | 37  | Stomach | Adenocarcinoma                                   | 2     | T3N1M0 | Malignant |
| B10      | 20     | M      | 54  | Stomach | Adenocarcinoma                                   | 2     | T3N0M0 | Malignant |
| C1       | 21     | M      | 63  | Stomach | Adenocarcinoma                                   | 2     | T3N1M0 | Malignant |
| C2       | 22     | M      | 62  | Stomach | Mucinous adenocarcinoma                          | 2     | T3N4M0 | Malignant |
| C3       | 23     | M      | 75  | Stomach | Adenocarcinoma of cardia and esophagus           | 3     | T2N1M0 | Malignant |
| C4       | 24     | M      | 56  | Stomach | Adenocarcinoma                                   | 2     | T3N0M0 | Malignant |
| C5       | 25     | M      | 56  | Stomach | Adenocarcinoma                                   | 2     | T3NxM0 | Malignant |
| C6       | 26     | F      | 60  | Stomach | Adenocarcinoma                                   | 2     | T3N1M0 | Malignant |
| C7       | 27     | F      | 72  | Stomach | Adenocarcinoma                                   | 2     | T3N0M0 | Malignant |
| C8       | 28     | M      | 66  | Stomach | Adenocarcinoma                                   | 2     | T2N3M0 | Malignant |
| C9       | 29     | M      | 39  | Stomach | Adenocarcinoma                                   | 2     | T3N1M0 | Malignant |
| C10      | 30     | M      | 42  | Stomach | Adenocarcinoma (sparse)                          | 3     | T3N2M0 | Malignant |
| D1       | 31     | M      | 49  | Stomach | Adenocarcinoma                                   | 2     | T3N0M0 | Malignant |
| D2       | 32     | M      | 58  | Stomach | Signet-ring cell carcinoma                       | –     | T3N1M0 | Malignant |
| D3       | 33     | M      | 45  | Stomach | Adenocarcinoma                                   | 3     | T3N3M0 | Malignant |
| D4       | 34     | M      | 55  | Stomach | Adenocarcinoma                                   | 3     | T3N1M0 | Malignant |
| D5       | 35     | F      | 49  | Stomach | Adenocarcinoma                                   | 2     | T3N3M0 | Malignant |
| D6       | 36     | F      | 54  | Stomach | Adenocarcinoma                                   | 2     | T3N3M0 | Malignant |
| D7       | 37     | M      | 55  | Stomach | Adenocarcinoma                                   | 2     | T3N3M0 | Malignant |
| D8       | 38     | M      | 58  | Stomach | Adenocarcinoma                                   | 3     | T4N1M1 | Malignant |
| D9       | 39     | M      | 51  | Stomach | Adenocarcinoma                                   | 3     | T3N2M0 | Malignant |
| D10      | 40     | F      | 51  | Stomach | Adenocarcinoma                                   | 3     | T3N1M0 | Malignant |
| E1       | 41     | M      | 55  | Stomach | Mucinous adenocarcinoma                          | 2     | T3N4M0 | Malignant |
| E2       | 42     | M      | 68  | Stomach | Adenocarcinoma                                   | 3     | T3N1M0 | Malignant |
| E3       | 43     | F      | 53  | Stomach | Mucinous adenocarcinoma                          | 2     | T3N2M0 | Malignant |
| E4       | 44     | M      | 42  | Stomach | Adenocarcinoma                                   | 3     | T2N1M0 | Malignant |
| E5       | 45     | F      | 50  | Stomach | Adenocarcinoma (sparse)                          | 3     | T3N0M0 | Malignant |
| E6       | 46     | F      | 55  | Stomach | Adenocarcinoma                                   | 3     | T3N1M0 | Malignant |
| E7       | 47     | M      | 66  | Stomach | Adenocarcinoma                                   | 3     | T3N0M0 | Malignant |
| E8       | 48     | F      | 65  | Stomach | Adenocarcinoma                                   | 3     | T3N0M0 | Malignant |
| E9       | 49     | M      | 72  | Stomach | Adenocarcinoma                                   | 3     | T3N1M0 | Malignant |
| E10      | 50     | M      | 55  | Stomach | Adenocarcinoma                                   | 3     | T3N0M0 | Malignant |

|     |    |   |    |         |                                                          |     |        |           |
|-----|----|---|----|---------|----------------------------------------------------------|-----|--------|-----------|
| F1  | 51 | F | 40 | Stomach | Adenocarcinoma (smooth muscle and blood vessel)          | –   | T3N3M0 | Malignant |
| F2  | 52 | M | 53 | Stomach | Adenocarcinoma (smooth muscle and blood vessel)          | –   | T3N0M0 | Malignant |
| F3  | 53 | M | 72 | Stomach | Mucinous adenocarcinoma                                  | 3   | T3N1M0 | Malignant |
| F4  | 54 | M | 65 | Stomach | Adenocarcinoma                                           | 3   | T3N0M0 | Malignant |
| F5  | 55 | M | 56 | Stomach | Adenocarcinoma                                           | 3   | T3N0M0 | Malignant |
| F6  | 56 | M | 45 | Stomach | Adenocarcinoma                                           | 3–4 | T3N0M0 | Malignant |
| F7  | 57 | M | 70 | Stomach | Adenocarcinoma (sparse)                                  | 3   | T3N0M0 | Malignant |
| F8  | 58 | M | 47 | Stomach | Adenocarcinoma                                           | 3   | T3N2M0 | Malignant |
| F9  | 59 | M | 50 | Stomach | Adenocarcinoma                                           | 3   | T3N1M0 | Malignant |
| F10 | 60 | M | 50 | Stomach | Mucinous adenocarcinoma                                  | 3   | T3N3M0 | Malignant |
| G1  | 61 | M | 60 | Stomach | Adenocarcinoma                                           | 3   | T3N2M0 | Malignant |
| G2  | 62 | M | 72 | Stomach | Adenocarcinoma                                           | 3   | T3N2M0 | Malignant |
| G3  | 63 | M | 62 | Stomach | Adenocarcinoma                                           | 3   | T3N3M0 | Malignant |
| G4  | 64 | M | 64 | Stomach | Adenocarcinoma                                           | 3   | T3N1M0 | Malignant |
| G5  | 65 | M | 61 | Stomach | Adenocarcinoma                                           | 3   | T3N3M0 | Malignant |
| G6  | 66 | F | 35 | Stomach | Adenocarcinoma                                           | 3   | T3N1M0 | Malignant |
| G7  | 67 | M | 55 | Stomach | Adenocarcinoma                                           | 4   | T3N3M0 | Malignant |
| G8  | 68 | M | 53 | Stomach | Adenocarcinoma                                           | 4   | T3N0M0 | Malignant |
| G9  | 69 | M | 27 | Stomach | Adenocarcinoma                                           | 4   | T2N1M0 | Malignant |
| G10 | 70 | F | 55 | Stomach | Adenocarcinoma                                           | 4   | T3N3M0 | Malignant |
| H1  | 71 | M | 35 | Stomach | Normal gastric tissue                                    | –   | –      | Normal    |
| H2  | 72 | M | 40 | Stomach | Normal gastric tissue                                    | –   | –      | Normal    |
| H3  | 73 | F | 38 | Stomach | Normal gastric tissue                                    | –   | –      | Normal    |
| H4  | 74 | M | 48 | Stomach | Normal gastric tissue                                    | –   | –      | Normal    |
| H5  | 75 | M | 35 | Stomach | Normal gastric tissue                                    | –   | –      | Normal    |
| H6  | 76 | M | 30 | Stomach | Normal gastric tissue                                    | –   | –      | Normal    |
| H7  | 77 | M | 35 | Stomach | Normal gastric tissue (smooth muscle and adipose tissue) | –   | –      | Normal    |
| H8  | 78 | M | 30 | Stomach | Normal gastric tissue                                    | –   | –      | Normal    |
| H9  | 79 | M | 50 | Stomach | Normal gastric tissue                                    | –   | –      | Normal    |
| H10 | 80 | M | 25 | Stomach | Normal gastric tissue                                    | –   | –      | Normal    |

| Location | Number | Gender | Age | Organ   | Diagnosis                    | TNM     | Type      | Immuno-staining intensity | Immuno-staining extent |
|----------|--------|--------|-----|---------|------------------------------|---------|-----------|---------------------------|------------------------|
| A1       | 1      | F      | 64  | Thyroid | Papillary carcinoma          | T1N1M0  | Malignant | 3                         | 4                      |
| A2       | 2      | F      | 64  | Thyroid | Papillary carcinoma          | T1N1M0  | Malignant | 3                         | 3                      |
| A3       | 3      | F      | 37  | Thyroid | Papillary carcinoma          | T4N0M0  | Malignant | 3                         | 4                      |
| A4       | 4      | F      | 37  | Thyroid | Papillary carcinoma          | T4N0M0  | Malignant | 3                         | 4                      |
| A5       | 5      | F      | 39  | Thyroid | Papillary carcinoma          | T2N0M0  | Malignant | 3                         | 4                      |
| A6       | 6      | F      | 39  | Thyroid | Papillary carcinoma          | T2N0M0  | Malignant | 3                         | 3                      |
| A7       | 7      | F      | 26  | Thyroid | Papillary carcinoma (sparse) | T3N1M0  | Malignant | 3                         | 2                      |
| A8       | 8      | F      | 26  | Thyroid | Papillary carcinoma          | T3N1M0  | Malignant | 1                         | 2                      |
| A9       | 9      | F      | 62  | Thyroid | Papillary carcinoma          | T3N0M0  | Malignant | 2                         | 1                      |
| A10      | 10     | F      | 62  | Thyroid | Papillary carcinoma          | T3N0M0  | Malignant | 3                         | 1                      |
| B1       | 11     | F      | 42  | Thyroid | Papillary carcinoma          | T2N0M0  | Malignant | 3                         | 3                      |
| B2       | 12     | F      | 42  | Thyroid | Papillary carcinoma          | T2N0M0  | Malignant | 3                         | 3                      |
| B3       | 13     | F      | 26  | Thyroid | Papillary carcinoma          | T2aN1M0 | Malignant | 3                         | 4                      |
| B4       | 14     | F      | 26  | Thyroid | Papillary carcinoma          | T2aN1M0 | Malignant | 3                         | 4                      |
| B5       | 15     | F      | 46  | Thyroid | Papillary carcinoma          | T4N0M0  | Malignant | 3                         | 4                      |
| B6       | 16     | F      | 46  | Thyroid | Papillary carcinoma          | T4N0M0  | Malignant | 1                         | 1                      |
| B7       | 17     | F      | 32  | Thyroid | Papillary carcinoma          | T2N0M0  | Malignant | 3                         | 4                      |
| B8       | 18     | F      | 32  | Thyroid | Papillary carcinoma          | T2N0M0  | Malignant | 3                         | 4                      |
| B9       | 19     | F      | 55  | Thyroid | Papillary carcinoma          | T2N0M0  | Malignant | 1                         | 1                      |
| B10      | 20     | F      | 55  | Thyroid | Papillary carcinoma          | T2N0M0  | Malignant | 2                         | 4                      |
| C1       | 21     | F      | 30  | Thyroid | Papillary carcinoma          | T2N0M0  | Malignant | 2                         | 2                      |
| C2       | 22     | F      | 30  | Thyroid | Papillary carcinoma          | T2N0M0  | Malignant | 3                         | 4                      |
| C3       | 23     | F      | 21  | Thyroid | Papillary carcinoma          | T2aN0M0 | Malignant | 3                         | 4                      |
| C4       | 24     | F      | 21  | Thyroid | Papillary carcinoma          | T2aN0M1 | Malignant | 3                         | 4                      |
| C5       | 25     | M      | 31  | Thyroid | Papillary carcinoma          | T3N0M0  | Malignant | 3                         | 4                      |
| C6       | 26     | M      | 31  | Thyroid | Papillary carcinoma          | T3N0M0  | Malignant | 3                         | 4                      |
| C7       | 27     | M      | 36  | Thyroid | Papillary carcinoma          | T2N0M0  | Malignant | 3                         | 4                      |
| C8       | 28     | M      | 36  | Thyroid | Papillary carcinoma          | T2N0M0  | Malignant | 3                         | 4                      |
| C9       | 29     | F      | 40  | Thyroid | Papillary carcinoma          | T3aN1M0 | Malignant | 2                         | 2                      |
| C10      | 30     | F      | 40  | Thyroid | Papillary carcinoma          | T3aN1M0 | Malignant | 3                         | 3                      |
| D1       | 31     | F      | 67  | Thyroid | Papillary carcinoma          | T4N0M0  | Malignant | 3                         | 4                      |
| D2       | 32     | F      | 67  | Thyroid | Papillary carcinoma          | T4N0M0  | Malignant | 3                         | 4                      |
| D3       | 33     | F      | 19  | Thyroid | Papillary carcinoma          | T3N1M0  | Malignant | 3                         | 4                      |
| D4       | 34     | F      | 19  | Thyroid | Papillary carcinoma          | T3N1M0  | Malignant | 3                         | 4                      |
| D5       | 35     | F      | 65  | Thyroid | Papillary carcinoma          | T3N0M0  | Malignant | 3                         | 4                      |
| D6       | 36     | F      | 65  | Thyroid | Papillary carcinoma          | T3N0M0  | Malignant | 3                         | 4                      |
| D7       | 37     | F      | 54  | Thyroid | Papillary carcinoma (sparse) | T4N0M0  | Malignant | 3                         | 4                      |
| D8       | 38     | F      | 54  | Thyroid | Papillary carcinoma          | T4N0M0  | Malignant | 3                         | 4                      |
| D9       | 39     | F      | 28  | Thyroid | Papillary carcinoma          | T3N0M0  | Malignant | 3                         | 4                      |
| D10      | 40     | F      | 28  | Thyroid | Papillary carcinoma          | T3N0M0  | Malignant | 3                         | 4                      |
| E1       | 41     | M      | 44  | Thyroid | Papillary carcinoma          | T3N2M0  | Malignant | 3                         | 4                      |
| E2       | 42     | M      | 44  | Thyroid | Papillary carcinoma          | T3N2M0  | Malignant | 3                         | 4                      |
| E3       | 43     | F      | 48  | Thyroid | Papillary carcinoma          | T4N0M0  | Malignant | 3                         | 4                      |
| E4       | 44     | F      | 48  | Thyroid | Papillary carcinoma          | T4N0M0  | Malignant | 3                         | 4                      |
| E5       | 45     | F      | 24  | Thyroid | Papillary carcinoma          | T4N3M0  | Malignant | 3                         | 4                      |
| E6       | 46     | F      | 24  | Thyroid | Papillary carcinoma          | T4N3M0  | Malignant | 3                         | 4                      |
| E7       | 47     | F      | 27  | Thyroid | Papillary carcinoma          | –       | Malignant | 3                         | 4                      |
| E8       | 48     | F      | 27  | Thyroid | Papillary carcinoma          | –       | Malignant | 3                         | 4                      |
| E9       | 49     | M      | 69  | Thyroid | Papillary carcinoma          | T2N0M0  | Malignant | 3                         | 4                      |

|     |    |   |    |         |                                       |        |           |   |   |
|-----|----|---|----|---------|---------------------------------------|--------|-----------|---|---|
| E10 | 50 | M | 69 | Thyroid | Papillary carcinoma                   | T2N0M0 | Malignant | 3 | 4 |
| F1  | 51 | M | 63 | Thyroid | Papillary carcinoma                   | T2N0M0 | Malignant | 3 | 4 |
| F2  | 52 | M | 63 | Thyroid | Papillary carcinoma                   | T2N0M0 | Malignant | 3 | 4 |
| F3  | 53 | F | 24 | Thyroid | Papillary carcinoma                   | T2N0M0 | Malignant | 3 | 4 |
| F4  | 54 | F | 24 | Thyroid | Papillary carcinoma                   | T2N0M0 | Malignant | 3 | 4 |
| F5  | 55 | M | 40 | Thyroid | Follicular adenocarcinoma             | T2N2M0 | Malignant | 3 | 4 |
| F6  | 56 | M | 40 | Thyroid | Follicular adenocarcinoma             | T2N2M0 | Malignant | 3 | 4 |
| F7  | 57 | F | 42 | Thyroid | Follicular adenocarcinoma             | T4N0M0 | Malignant | 3 | 4 |
| F8  | 58 | F | 42 | Thyroid | Follicular adenocarcinoma             | T4N0M0 | Malignant | 3 | 4 |
| F9  | 59 | F | 60 | Thyroid | Follicular adenocarcinoma             | T4N0M0 | Malignant | 3 | 4 |
| F10 | 60 | F | 60 | Thyroid | Follicular adenocarcinoma             | T4N0M0 | Malignant | 3 | 4 |
| G1  | 61 | F | 38 | Thyroid | Cancer adjacent normal thyroid tissue | T2N1M0 | NAT       | 0 | 0 |
| G2  | 62 | F | 38 | Thyroid | Cancer adjacent normal thyroid tissue | T2N1M0 | NAT       | 0 | 0 |
| G3  | 63 | F | 42 | Thyroid | Cancer adjacent normal thyroid tissue | T2N0M0 | NAT       | 0 | 0 |
| G4  | 64 | F | 42 | Thyroid | Cancer adjacent normal thyroid tissue | T2N0M0 | NAT       | 0 | 0 |
| G5  | 65 | M | 36 | Thyroid | Cancer adjacent normal thyroid tissue | T3N0M0 | NAT       | 0 | 0 |
| G6  | 66 | M | 36 | Thyroid | Cancer adjacent normal thyroid tissue | T3N0M0 | NAT       | 0 | 0 |
| G7  | 67 | M | 33 | Thyroid | Cancer adjacent normal thyroid tissue | T1N0M0 | NAT       | 0 | 0 |
| G8  | 68 | M | 33 | Thyroid | Cancer adjacent normal thyroid tissue | T1N0M0 | NAT       | 0 | 0 |
| G9  | 69 | M | 77 | Thyroid | Cancer adjacent normal thyroid tissue | T2N0M0 | NAT       | 0 | 0 |
| G10 | 70 | M | 77 | Thyroid | Cancer adjacent normal thyroid tissue | T2N0M0 | NAT       | 0 | 0 |
| H1  | 71 | M | 40 | Thyroid | Normal thyroid tissue                 | -      | Normal    | 0 | 0 |
| H2  | 72 | M | 40 | Thyroid | Normal thyroid tissue                 | -      | Normal    | 0 | 0 |
| H3  | 73 | M | 35 | Thyroid | Normal thyroid tissue                 | -      | Normal    | 0 | 0 |
| H4  | 74 | M | 35 | Thyroid | Normal thyroid tissue                 | -      | Normal    | 0 | 0 |
| H5  | 75 | M | 28 | Thyroid | Normal thyroid tissue                 | -      | Normal    | 0 | 0 |
| H6  | 76 | M | 28 | Thyroid | Normal thyroid tissue                 | -      | Normal    | 0 | 0 |
| H7  | 77 | M | 19 | Thyroid | Normal thyroid tissue                 | -      | Normal    | 0 | 0 |
| H8  | 78 | M | 19 | Thyroid | Normal thyroid tissue                 | -      | Normal    | 0 | 0 |
| H9  | 79 | M | 38 | Thyroid | Normal thyroid tissue                 | -      | Normal    | 0 | 0 |
| H10 | 80 | M | 38 | Thyroid | Normal thyroid tissue                 | -      | Normal    | 0 | 0 |
