# Supplementary material
Source: publisher site journal article supplement (https://www.dovepress.com/article/92389)
Supplement: Supplementary file 3 [file get_supplementary_file.php]

# P53 signaling pathway

Visualization of log<sub>2</sub>(Fold Change)

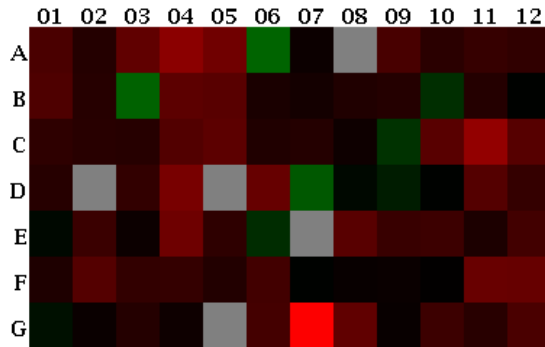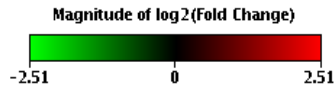

| Layout | 01                     | 02                        | 03                        | 04                      | 05                    | 06                      | 07                   | 08                     | 09                     | 10                    | 11                    | 12                      |
|--------|------------------------|---------------------------|---------------------------|-------------------------|-----------------------|-------------------------|----------------------|------------------------|------------------------|-----------------------|-----------------------|-------------------------|
| A      | APAF1<br>1.65<br>OKAY  | ATM<br>1.28<br>OKAY       | ATR<br>1.91<br>OKAY       | BAI1<br>2.61<br>B       | BAX<br>2.16<br>OKAY   | BBC3<br>-1.98<br>OKAY   | BCL2<br>1.09<br>OKAY | BCL2A1<br>1.07<br>C    | BID<br>1.63<br>OKAY    | BIRC5<br>1.32<br>OKAY | BRCA1<br>1.44<br>OKAY | BRCA2<br>1.40<br>OKAY   |
| B      | BTG2<br>1.69<br>OKAY   | CASP2<br>1.29<br>OKAY     | CASP9<br>-1.94<br>OKAY    | CCNB1<br>1.88<br>OKAY   | CCNE1<br>1.82<br>OKAY | CCNG1<br>1.19<br>OKAY   | CCNH<br>1.14<br>OKAY | CDC25A<br>1.25<br>OKAY | CDC25C<br>1.28<br>OKAY | CDK1<br>-1.37<br>OKAY | CDK4<br>1.28<br>OKAY  | CDKN1A<br>-1.02<br>OKAY |
| C      | CDKN2A<br>1.37<br>OKAY | CHEK1<br>1.31<br>OKAY     | CHEK2<br>1.29<br>OKAY     | CRADD<br>1.76<br>OKAY   | DNMT1<br>1.87<br>OKAY | E2F1<br>1.24<br>OKAY    | E2F3<br>1.28<br>OKAY | EGFR<br>1.09<br>OKAY   | EGR1<br>-1.41<br>OKAY  | EI24<br>1.82<br>OKAY  | ESR1<br>2.75<br>B     | FADD<br>1.81<br>OKAY    |
| D      | FAS<br>1.30<br>OKAY    | FASLG<br>1.07<br>C        | FOXO3<br>1.40<br>OKAY     | GADD45A<br>2.28<br>OKAY | GML<br>1.07<br>C      | HDAC1<br>2.00<br>OKAY   | HK2<br>-1.82<br>OKAY | IGF1R<br>-1.05<br>OKAY | IL6<br>-1.21<br>OKAY   | JUN<br>-1.01<br>OKAY  | KAT2B<br>1.76<br>OKAY | KRAS<br>1.43<br>OKAY    |
| E      | MCL1<br>-1.06<br>OKAY  | MDM2<br>1.48<br>OKAY      | MDM4<br>1.08<br>OKAY      | MLH1<br>2.11<br>OKAY    | MSH2<br>1.37<br>OKAY  | MYC<br>-1.36<br>OKAY    | MYOD1<br>1.07<br>C   | NF1<br>1.82<br>OKAY    | NFKB1<br>1.46<br>OKAY  | PCNA<br>1.51<br>OKAY  | PIDD<br>1.21<br>OKAY  | PPM1D<br>1.56<br>OKAY   |
| F      | PRC1<br>1.24<br>OKAY   | PRKCA<br>1.79<br>OKAY     | PTEN<br>1.41<br>OKAY      | PTTG1<br>1.43<br>OKAY   | RB1<br>1.26<br>OKAY   | RELA<br>1.57<br>OKAY    | RPRM<br>-1.01<br>B   | SESN2<br>1.06<br>OKAY  | SIAH1<br>1.07<br>OKAY  | SIRT1<br>1.02<br>OKAY | STAT1<br>2.03<br>OKAY | TADA3<br>2.00<br>OKAY   |
| G      | TNF<br>-1.12<br>B      | TNFRSF10B<br>1.07<br>OKAY | TNFRSF10D<br>1.29<br>OKAY | TP53<br>1.10<br>OKAY    | TP53AIP1<br>1.07<br>C | TP53BP2<br>1.59<br>OKAY | TP63<br>5.70<br>A    | TP73<br>1.92<br>B      | TRAF2<br>1.06<br>OKAY  | TSC1<br>1.51<br>OKAY  | WT1<br>1.31<br>B      | XRCC5<br>1.66<br>OKAY   |

**MNK-45**

Visualization of log<sub>2</sub>(Fold Change)

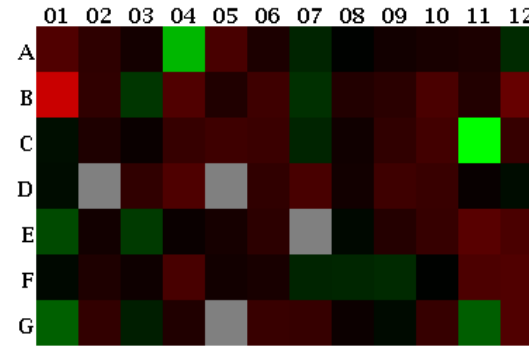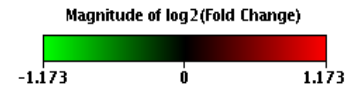

| Layout | 01                      | 02                        | 03                         | 04                      | 05                     | 06                      | 07                    | 08                     | 09                     | 10                    | 11                    | 12                     |
|--------|-------------------------|---------------------------|----------------------------|-------------------------|------------------------|-------------------------|-----------------------|------------------------|------------------------|-----------------------|-----------------------|------------------------|
| A      | APAF1<br>1.29<br>OKAY   | ATM<br>1.16<br>OKAY       | ATR<br>1.07<br>OKAY        | BAI1<br>-1.00<br>B      | BAX<br>1.26<br>OKAY    | BBC3<br>1.09<br>OKAY    | BCL2<br>-1.12<br>OKAY | BCL2A1<br>-1.01<br>B   | BID<br>1.06<br>OKAY    | BIRC5<br>1.08<br>OKAY | BRCA1<br>1.09<br>OKAY | BRCA2<br>-1.14<br>OKAY |
| B      | BTG2<br>1.90<br>OKAY    | CASP2<br>1.16<br>OKAY     | CASP9<br>-1.19<br>OKAY     | CCNB1<br>1.29<br>OKAY   | CCNE1<br>1.11<br>OKAY  | CCNG1<br>1.22<br>OKAY   | CCNH<br>-1.16<br>OKAY | CDC25A<br>1.11<br>OKAY | CDC25C<br>1.15<br>OKAY | CDK1<br>1.27<br>OKAY  | CDK4<br>1.11<br>OKAY  | CDKN1A<br>1.38<br>OKAY |
| C      | CDKN2A<br>-1.04<br>OKAY | CHEK1<br>1.10<br>OKAY     | CHEK2<br>1.03<br>OKAY      | CRADD<br>1.19<br>OKAY   | DNMT1<br>1.22<br>OKAY  | E2F1<br>1.21<br>OKAY    | E2F3<br>-1.12<br>OKAY | EGFR<br>1.05<br>OKAY   | EGR1<br>1.17<br>OKAY   | EI24<br>1.23<br>OKAY  | ESR1<br>1.03<br>OKAY  | FADD<br>-1.18<br>OKAY  |
| D      | FAS<br>-1.04<br>OKAY    | FASLG<br>-1.03<br>C       | FOXO3<br>1.07<br>OKAY      | GADD45A<br>1.28<br>OKAY | GML<br>-1.03<br>C      | HDAC1<br>1.17<br>OKAY   | HK2<br>1.26<br>OKAY   | IGF1R<br>1.06<br>B     | IL6<br>1.22<br>OKAY    | JUN<br>1.19<br>OKAY   | KAT2B<br>1.03<br>OKAY | KRAS<br>-1.04<br>OKAY  |
| E      | MCL1<br>-1.26<br>OKAY   | MDM2<br>1.06<br>OKAY      | MDM4<br>-1.21<br>OKAY      | MLH1<br>1.03<br>OKAY    | MSH2<br>1.07<br>OKAY   | MYC<br>1.15<br>OKAY     | MYOD1<br>-1.03<br>C   | NF1<br>-1.03<br>OKAY   | NFKB1<br>1.12<br>OKAY  | PCNA<br>1.19<br>OKAY  | PIDD<br>1.32<br>OKAY  | PPM1D<br>1.27<br>OKAY  |
| F      | PRC1<br>-1.02<br>OKAY   | PRKCA<br>1.10<br>OKAY     | PTEN<br>1.04<br>OKAY       | PTTG1<br>1.26<br>OKAY   | RB1<br>1.06<br>OKAY    | RELA<br>1.08<br>OKAY    | RPRM<br>-1.12<br>OKAY | SESN2<br>-1.13<br>OKAY | SIAH1<br>-1.15<br>OKAY | SIRT1<br>1.03<br>OKAY | STAT1<br>1.27<br>OKAY | TADA3<br>1.29<br>OKAY  |
| G      | TNF<br>-1.36<br>B       | TNFRSF10B<br>1.17<br>OKAY | TNFRSF10D<br>-1.10<br>OKAY | TP53<br>1.11<br>OKAY    | TP53AIP1<br>-1.03<br>C | TP53BP2<br>1.20<br>OKAY | TP63<br>1.19<br>OKAY  | TP73<br>1.04<br>B      | TRAF2<br>-1.03<br>OKAY | TSC1<br>1.19<br>OKAY  | WT1<br>-1.35<br>B     | XRCC5<br>1.29<br>OKAY  |

**Bel-7402**

# Signal transduction pathway

Visualization of log<sub>2</sub>(Fold Change)

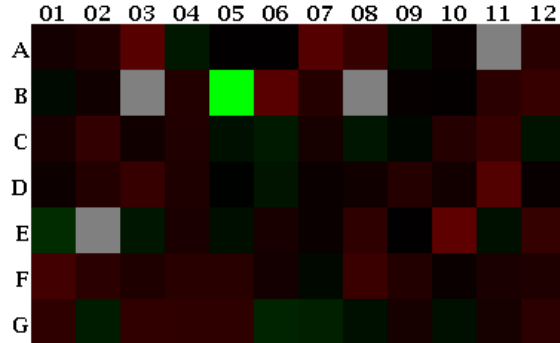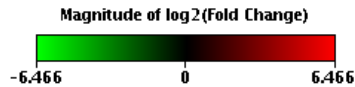

| Layout | 01                     | 02                    | 03                     | 04                   | 05                       | 06                     | 07                        | 08                      | 09                     | 10                     | 11                      | 12                       |
|--------|------------------------|-----------------------|------------------------|----------------------|--------------------------|------------------------|---------------------------|-------------------------|------------------------|------------------------|-------------------------|--------------------------|
| A      | ACSL3<br>1.41<br>OKAY  | ACSL4<br>1.67<br>OKAY | ACSL5<br>4.48<br>A     | ADM<br>-1.53<br>OKAY | ARNT<br>1.04<br>OKAY     | ATF4<br>1.03<br>OKAY   | AXIN2<br>4.35<br>B        | BAX<br>2.63<br>OKAY     | BBC3<br>-1.29<br>OKAY  | BCL2<br>1.14<br>OKAY   | BCL2A1<br>1.07<br>C     | BCL2L1<br>2.00<br>OKAY   |
| B      | BIRC3<br>-1.20<br>OKAY | BMP2<br>1.31<br>OKAY  | BMP4<br>1.07<br>C      | BTG2<br>1.81<br>A    | CA9<br>-88.40<br>A       | CCL5<br>4.68<br>A      | CCND1<br>1.85<br>OKAY     | CCND2<br>1.07<br>C      | CDKN1A<br>1.10<br>OKAY | CDKN1B<br>1.07<br>OKAY | CEBPD<br>2.09<br>OKAY   | CPT2<br>2.54<br>OKAY     |
| C      | CSF1<br>1.52<br>OKAY   | DAB2<br>2.43<br>OKAY  | EGFR<br>1.33<br>OKAY   | EMP1<br>1.78<br>OKAY | EPO<br>-1.32<br>B        | FABP1<br>-1.58<br>B    | FAS<br>1.45<br>OKAY       | FCER2<br>-1.48<br>B     | FOSL1<br>-1.13<br>OKAY | FTH1<br>1.91<br>OKAY   | GADD45A<br>2.61<br>OKAY | GADD45B<br>-1.36<br>OKAY |
| D      | GATA3<br>1.26<br>B     | GCLC<br>1.79<br>OKAY  | GCLM<br>2.59<br>OKAY   | GSR<br>1.69<br>OKAY  | HERPUD1<br>-1.05<br>OKAY | HES1<br>-1.41<br>OKAY  | HES5<br>1.20<br>OKAY      | HEY1<br>1.31<br>OKAY    | HEY2<br>1.90<br>OKAY   | HEYL<br>1.36<br>B      | HMOX1<br>4.22<br>OKAY   | ICAM1<br>1.16<br>OKAY    |
| E      | ID1<br>-2.18<br>OKAY   | IFNG<br>1.07<br>C     | IFRD1<br>-1.47<br>OKAY | IRF1<br>1.58<br>OKAY | JAG1<br>-1.29<br>OKAY    | LDHA<br>1.53<br>OKAY   | LFNG<br>1.18<br>OKAY      | LRG1<br>2.23<br>OKAY    | MCL1<br>1.05<br>OKAY   | MMP7<br>5.24<br>A      | MYC<br>-1.33<br>OKAY    | NOTCH1<br>2.49<br>OKAY   |
| F      | NQO1<br>3.16<br>OKAY   | OLR1<br>2.11<br>OKAY  | PCNA<br>1.72<br>OKAY   | PPAD<br>2.01<br>OKAY | PTCH1<br>2.03<br>OKAY    | RB1<br>1.42<br>OKAY    | SERPINE1<br>-1.16<br>OKAY | SLC27A4<br>2.73<br>OKAY | SLC2A1<br>1.79<br>OKAY | SOC3<br>1.19<br>OKAY   | SORBS1<br>1.57<br>OKAY  | SQSTM1<br>1.69<br>OKAY   |
| G      | STAT1<br>2.22<br>OKAY  | TNF<br>-1.66<br>B     | TNFSF10<br>2.33<br>B   | TXN<br>2.23<br>OKAY  | TXNRD1<br>2.21<br>OKAY   | VEGFA<br>-1.88<br>OKAY | WISP1<br>-1.75<br>B       | WNT1<br>-1.34<br>B      | WNT2<br>1.47<br>OKAY   | WNT3A<br>-1.32<br>B    | WNT5A<br>1.47<br>OKAY   | WNT6<br>2.19<br>OKAY     |

**MNK-45**

Visualization of log<sub>2</sub>(Fold Change)

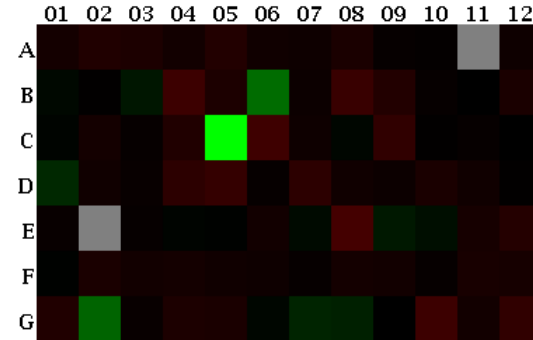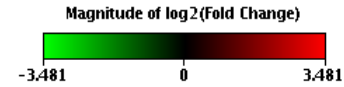

| Layout | 01                     | 02                    | 03                    | 04                    | 05                      | 06                     | 07                       | 08                      | 09                     | 10                     | 11                      | 12                      |
|--------|------------------------|-----------------------|-----------------------|-----------------------|-------------------------|------------------------|--------------------------|-------------------------|------------------------|------------------------|-------------------------|-------------------------|
| A      | ACSL3<br>1.22<br>OKAY  | ACSL4<br>1.35<br>OKAY | ACSL5<br>1.31<br>OKAY | ADM<br>1.19<br>OKAY   | ARNT<br>1.39<br>OKAY    | ATF4<br>1.16<br>OKAY   | AXIN2<br>1.14<br>OKAY    | BAX<br>1.28<br>OKAY     | BBC3<br>1.07<br>OKAY   | BCL2<br>1.05<br>OKAY   | BCL2A1<br>-2.49<br>C    | BCL2L1<br>1.14<br>OKAY  |
| B      | BIRC3<br>-1.07<br>OKAY | BMP2<br>1.03<br>OKAY  | BMP4<br>-1.24<br>A    | BTG2<br>1.75<br>OKAY  | CA9<br>1.31<br>OKAY     | CCL5<br>-2.78<br>B     | CCND1<br>1.13<br>OKAY    | CCND2<br>1.69<br>A      | CDKN1A<br>1.38<br>OKAY | CDKN1B<br>1.07<br>OKAY | CEBPD<br>1.00<br>OKAY   | CPT2<br>1.27<br>OKAY    |
| C      | CSF1<br>-1.04<br>OKAY  | DAB2<br>1.22<br>OKAY  | EGFR<br>1.06<br>OKAY  | EMP1<br>1.35<br>A     | EPO<br>-11.17<br>B      | FABP1<br>1.78<br>B     | FAS<br>1.13<br>OKAY      | FCER2<br>-1.07<br>B     | FOSL1<br>1.56<br>OKAY  | FTH1<br>1.02<br>OKAY   | GADD45A<br>1.05<br>OKAY | GADD45B<br>1.01<br>OKAY |
| D      | GATA3<br>-1.45<br>B    | GCLC<br>1.17<br>OKAY  | GCLM<br>1.08<br>OKAY  | GSR<br>1.53<br>OKAY   | HERPUD1<br>1.64<br>OKAY | HES1<br>1.05<br>OKAY   | HES5<br>1.52<br>A        | HEY1<br>1.17<br>OKAY    | HEY2<br>1.11<br>OKAY   | HEYL<br>1.28<br>B      | HMOX1<br>1.16<br>OKAY   | ICAM1<br>1.02<br>OKAY   |
| E      | ID1<br>1.08<br>OKAY    | IFNG<br>-2.49<br>C    | IFRD1<br>1.06<br>OKAY | IRF1<br>-1.03<br>OKAY | JAG1<br>-1.02<br>OKAY   | LDHA<br>1.18<br>OKAY   | LFNG<br>-1.09<br>OKAY    | LRG1<br>1.91<br>A       | MCL1<br>-1.27<br>OKAY  | MMP7<br>-1.13<br>B     | MYC<br>1.23<br>OKAY     | NOTCH1<br>1.40<br>OKAY  |
| F      | NQO1<br>-1.02<br>OKAY  | OLR1<br>1.27<br>OKAY  | PCNA<br>1.19<br>OKAY  | PPAD<br>1.22<br>OKAY  | PTCH1<br>1.17<br>OKAY   | RB1<br>1.15<br>OKAY    | SERPINE1<br>1.06<br>OKAY | SLC27A4<br>1.22<br>OKAY | SLC2A1<br>1.18<br>OKAY | SOC3<br>1.06<br>OKAY   | SORBS1<br>1.25<br>OKAY  | SQSTM1<br>1.24<br>OKAY  |
| G      | STAT1<br>1.36<br>OKAY  | TNF<br>-2.58<br>B     | TNFSF10<br>1.07<br>B  | TXN<br>1.30<br>OKAY   | TXNRD1<br>1.28<br>OKAY  | VEGFA<br>-1.05<br>OKAY | WISP1<br>-1.40<br>B      | WNT1<br>-1.34<br>A      | WNT2<br>1.77<br>OKAY   | WNT3A<br>1.18<br>B     | WNT5A<br>1.18<br>OKAY   | WNT6<br>1.58<br>OKAY    |

**Bel-7402**

# Tumor metastasis

Visualization of log<sub>2</sub>(Fold Change)

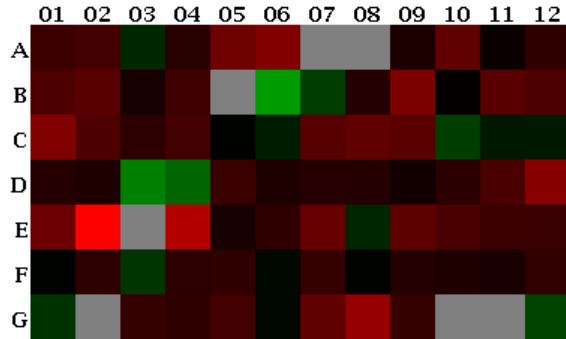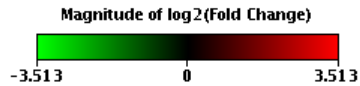

| Layout | 01                     | 02                     | 03                    | 04                    | 05                     | 06                     | 07                     | 08                        | 09                      | 10                    | 11                     | 12                     |
|--------|------------------------|------------------------|-----------------------|-----------------------|------------------------|------------------------|------------------------|---------------------------|-------------------------|-----------------------|------------------------|------------------------|
| A      | APC<br>1.78<br>OKAY    | BRMS1<br>1.91<br>OKAY  | CCL7<br>-1.46<br>B    | CD44<br>1.47<br>OKAY  | CD82<br>2.84<br>OKAY   | CDH1<br>3.37<br>OKAY   | CDH11<br>1.14<br>C     | CDH6<br>1.14<br>C         | CDKN2A<br>1.31<br>OKAY  | CHD4<br>2.48<br>OKAY  | COL4A2<br>1.09<br>OKAY | CST7<br>1.55<br>B      |
| B      | CTBP1<br>2.11<br>OKAY  | CTNNA1<br>2.27<br>OKAY | CTSK<br>1.24<br>OKAY  | CTSL<br>1.80<br>OKAY  | CXCL12<br>1.14<br>C    | CXCR2<br>-4.45<br>B    | CXCR4<br>-1.80<br>OKAY | DENR<br>1.42<br>OKAY      | EPHB2<br>3.30<br>OKAY   | ETV4<br>1.04<br>OKAY  | EWSR1<br>2.31<br>OKAY  | FAT1<br>2.09<br>OKAY   |
| C      | FGFR4<br>3.47<br>OKAY  | FLT4<br>2.12<br>B      | FN1<br>1.53<br>OKAY   | FXYD5<br>1.88<br>OKAY | GNRH1<br>-1.01<br>OKAY | HGF<br>-1.30<br>B      | HPSE<br>2.28<br>OKAY   | HRAS<br>2.52<br>OKAY      | HTATIP2<br>2.38<br>OKAY | IGF1<br>-1.81<br>B    | IL18<br>-1.26<br>OKAY  | IL1B<br>-1.28<br>OKAY  |
| D      | ITGA7<br>1.42<br>OKAY  | ITGB3<br>1.33<br>B     | KISS1<br>-3.43<br>B   | KISS1R<br>-2.58<br>B  | KRAS<br>1.73<br>OKAY   | MCAM<br>1.32<br>OKAY   | MDM2<br>1.43<br>OKAY   | MET<br>1.40<br>OKAY       | METAP2<br>1.20<br>OKAY  | MGAT5<br>1.50<br>OKAY | MMP10<br>1.99<br>B     | MMP11<br>3.75<br>A     |
| E      | MMP13<br>2.81<br>B     | MMP2<br>11.42<br>B     | MMP3<br>1.14<br>C     | MMP7<br>5.59<br>OKAY  | MMP9<br>1.24<br>OKAY   | MTA1<br>1.55<br>OKAY   | MTSS1<br>2.63<br>OKAY  | MYC<br>-1.44<br>A         | MYCL<br>2.45<br>OKAY    | NF2<br>2.04<br>OKAY   | NME1<br>1.76<br>OKAY   | NME4<br>1.71<br>OKAY   |
| F      | NR4A3<br>-1.02<br>OKAY | PLAUR<br>1.51<br>OKAY  | PNN<br>-1.64<br>OKAY  | PTEN<br>1.52<br>OKAY  | RB1<br>1.54<br>OKAY    | RORB<br>-1.08<br>OKAY  | RPSA<br>1.63<br>OKAY   | SERPINE1<br>-1.01<br>OKAY | SET<br>1.41<br>OKAY     | SMAD2<br>1.35<br>OKAY | SMAD4<br>1.28<br>OKAY  | SRC<br>1.58<br>OKAY    |
| G      | SSTR2<br>-1.61<br>B    | SVK<br>1.14<br>C       | TCF20<br>1.65<br>OKAY | TGFB1<br>1.54<br>OKAY | TIMP2<br>1.90<br>OKAY  | TIMP3<br>-1.07<br>OKAY | TIMP4<br>2.51<br>OKAY  | TNFSF10<br>4.23<br>A      | TP53<br>1.67<br>OKAY    | TRPM1<br>1.14<br>C    | TSHR<br>1.14<br>C      | VEGFA<br>-1.90<br>OKAY |

**MNK-45**

Visualization of log<sub>2</sub>(Fold Change)

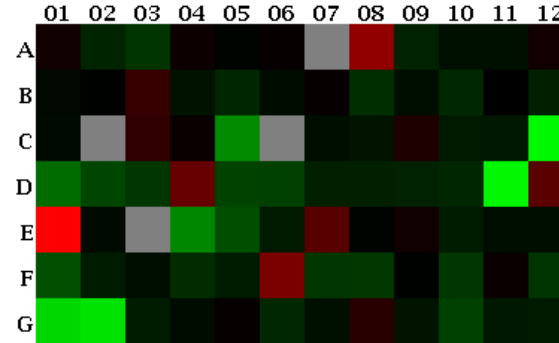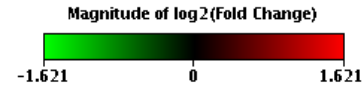

| Layout | 01                     | 02                      | 03                     | 04                     | 05                     | 06                     | 07                     | 08                        | 09                      | 10                     | 11                      | 12                     |
|--------|------------------------|-------------------------|------------------------|------------------------|------------------------|------------------------|------------------------|---------------------------|-------------------------|------------------------|-------------------------|------------------------|
| A      | APC<br>1.07<br>OKAY    | BRMS1<br>-1.17<br>OKAY  | CCL7<br>-1.26<br>B     | CD44<br>1.06<br>OKAY   | CD82<br>-1.02<br>OKAY  | CDH1<br>1.02<br>OKAY   | CDH11<br>1.10<br>B     | CDH6<br>1.90<br>B         | CDKN2A<br>-1.16<br>OKAY | CHD4<br>-1.07<br>OKAY  | COL4A2<br>-1.08<br>OKAY | CST7<br>1.09<br>B      |
| B      | CTBP1<br>-1.03<br>OKAY | CTNNA1<br>-1.01<br>OKAY | CTSK<br>1.27<br>OKAY   | CTSL<br>-1.09<br>B     | CXCL12<br>-1.19<br>B   | CXCR2<br>-1.06<br>OKAY | CXCR4<br>1.02<br>OKAY  | DENR<br>-1.23<br>OKAY     | EPHB2<br>-1.06<br>OKAY  | ETV4<br>-1.19<br>OKAY  | EWSR1<br>-1.00<br>OKAY  | FAT1<br>-1.15<br>OKAY  |
| C      | FGFR4<br>-1.05<br>OKAY | FLT4<br>1.10<br>C       | FN1<br>1.24<br>OKAY    | FXYD5<br>1.04<br>OKAY  | GNRH1<br>-1.85<br>OKAY | HGF<br>1.10<br>OKAY    | HPSE<br>-1.06<br>OKAY  | HRAS<br>-1.10<br>OKAY     | HTATIP2<br>1.14<br>OKAY | IGF1<br>-1.12<br>B     | IL18<br>-1.11<br>OKAY   | IL1B<br>-3.00<br>A     |
| D      | ITGA7<br>-1.61<br>B    | ITGB3<br>-1.36<br>B     | KISS1<br>-1.26<br>B    | KISS1R<br>1.57<br>OKAY | KRAS<br>-1.34<br>OKAY  | MCAM<br>-1.32<br>OKAY  | MDM2<br>-1.15<br>OKAY  | MET<br>-1.16<br>OKAY      | METAP2<br>-1.16<br>OKAY | MGAT5<br>-1.19<br>OKAY | MMP10<br>-2.99<br>B     | MMP11<br>1.48<br>A     |
| E      | MMP13<br>3.08<br>B     | MMP2<br>-1.04<br>B      | MMP3<br>1.10<br>C      | MMP7<br>-1.81<br>B     | MMP9<br>-1.41<br>OKAY  | MTA1<br>-1.13<br>A     | MTSS1<br>1.47<br>OKAY  | MYC<br>-1.02<br>B         | MYCL<br>1.07<br>OKAY    | NF2<br>-1.13<br>OKAY   | NME1<br>-1.07<br>OKAY   | NME4<br>-1.06<br>OKAY  |
| F      | NR4A3<br>-1.43<br>OKAY | PLAUR<br>-1.13<br>OKAY  | PNN<br>-1.07<br>OKAY   | PTEN<br>-1.22<br>OKAY  | RB1<br>-1.13<br>OKAY   | RORB<br>1.71<br>OKAY   | RPSA<br>-1.27<br>OKAY  | SERPINE1<br>-1.28<br>OKAY | SET<br>-1.01<br>OKAY    | SMAD2<br>-1.27<br>OKAY | SMAD4<br>1.04<br>OKAY   | SRC<br>-1.25<br>OKAY   |
| G      | SSTR2<br>-2.60<br>B    | SVK<br>-2.73<br>B       | TCF20<br>-1.13<br>OKAY | TGFB1<br>-1.05<br>OKAY | TIMP2<br>1.03<br>OKAY  | TIMP3<br>-1.19<br>OKAY | TIMP4<br>-1.07<br>OKAY | TNFSF10<br>1.19<br>B      | TP53<br>-1.09<br>OKAY   | TRPM1<br>-1.33<br>B    | TSHR<br>-1.11<br>B      | VEGFA<br>-1.12<br>OKAY |

**Bel-7402**

# Ongene & tumor suppress gene

Visualization of log2(Fold Change)

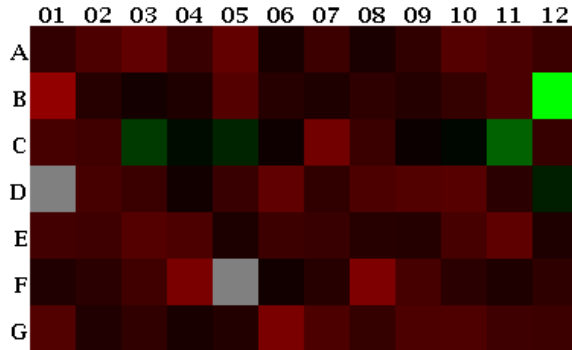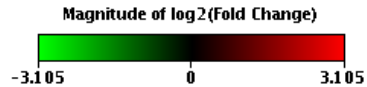

| Layout | 01                     | 02                    | 03                     | 04                     | 05                     | 06                    | 07                      | 08                     | 09                       | 10                       | 11                    | 12                    |
|--------|------------------------|-----------------------|------------------------|------------------------|------------------------|-----------------------|-------------------------|------------------------|--------------------------|--------------------------|-----------------------|-----------------------|
| A      | ABL1<br>1.51<br>OKAY   | AKT1<br>1.90<br>OKAY  | APC<br>2.26<br>OKAY    | ATM<br>1.61<br>OKAY    | BAX<br>2.27<br>OKAY    | BCL2<br>1.23<br>OKAY  | BCL2L1<br>1.67<br>OKAY  | BCR<br>1.25<br>OKAY    | BRCA1<br>1.51<br>OKAY    | BRCA2<br>2.02<br>OKAY    | CASP8<br>1.87<br>OKAY | CCND1<br>1.64<br>OKAY |
| B      | CDH1<br>3.49<br>OKAY   | CDK4<br>1.37<br>OKAY  | CDKN1A<br>1.19<br>OKAY | CDKN2A<br>1.28<br>OKAY | CDKN2B<br>2.02<br>OKAY | CDKN3<br>1.38<br>OKAY | CTNNB1<br>1.28<br>OKAY  | E2F1<br>1.48<br>OKAY   | EGF<br>1.35<br>B         | ELK1<br>1.55<br>OKAY     | ERBB2<br>1.88<br>OKAY | ESR1<br>-8.60<br>B    |
| C      | ETS1<br>1.79<br>OKAY   | FHIT<br>1.73<br>OKAY  | FOS<br>-1.63<br>OKAY   | FOXD3<br>-1.11<br>B    | HGF<br>-1.34<br>B      | HIC1<br>1.13<br>OKAY  | HRAS<br>2.63<br>OKAY    | IGF2R<br>1.63<br>OKAY  | JAK2<br>1.10<br>OKAY     | JUN<br>-1.05<br>OKAY     | JUNB<br>-2.30<br>OKAY | JUND<br>1.57<br>OKAY  |
| D      | KIT<br>-1.03<br>C      | KITLG<br>1.80<br>OKAY | KRAS<br>1.64<br>OKAY   | MCL1<br>1.16<br>OKAY   | MDM2<br>1.59<br>OKAY   | MEN1<br>2.23<br>OKAY  | MET<br>1.49<br>OKAY     | MGMT<br>1.89<br>OKAY   | MLH1<br>2.01<br>OKAY     | MOS<br>2.08<br>B         | MYB<br>1.44<br>OKAY   | MYC<br>-1.29<br>OKAY  |
| E      | MYCN<br>1.74<br>B      | NF1<br>1.69<br>OKAY   | NF2<br>2.03<br>OKAY    | NFKB1<br>1.89<br>OKAY  | NFKB1A<br>1.27<br>OKAY | NRAS<br>1.65<br>OKAY  | PIK3C2A<br>1.61<br>OKAY | PIK3CA<br>1.37<br>OKAY | PML<br>1.35<br>OKAY      | PRKCA<br>1.80<br>OKAY    | RAF1<br>2.20<br>OKAY  | RARA<br>1.30<br>OKAY  |
| F      | RASSF1<br>1.30<br>OKAY | RB1<br>1.43<br>OKAY   | REL<br>1.72<br>OKAY    | RET<br>2.78<br>B       | ROS1<br>-1.03<br>C     | RUNX1<br>1.17<br>OKAY | RUNX3<br>1.37<br>OKAY   | S100A4<br>2.87<br>OKAY | SERPINB5<br>1.79<br>OKAY | SH3PXD2A<br>1.43<br>OKAY | SMAD4<br>1.29<br>OKAY | SRC<br>1.48<br>OKAY   |
| G      | STAT3<br>1.98<br>OKAY  | STK11<br>1.31<br>B    | TGFB1<br>1.49<br>OKAY  | TNF<br>1.22<br>B       | TP53<br>1.33<br>OKAY   | TP73<br>2.81<br>A     | TSC1<br>1.17<br>OKAY    | VHL<br>1.90<br>OKAY    | WT1<br>1.90<br>B         | WWOX<br>1.94<br>OKAY     | XRCC1<br>1.70<br>OKAY | ZHX2<br>1.66<br>OKAY  |

**MNK-45**

Visualization of log2(Fold Change)

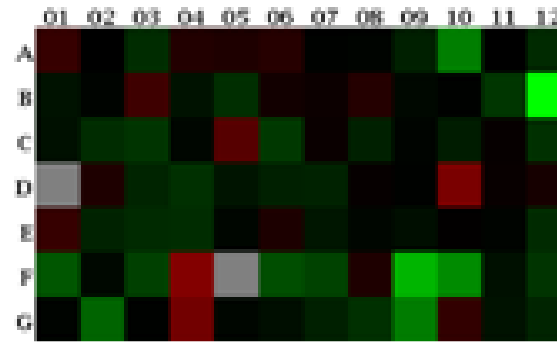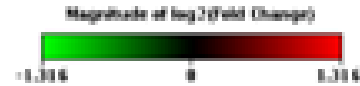

| Layout | 01                      | 02                    | 03                     | 04                      | 05                      | 06                     | 07                       | 08                      | 09                     | 10                        | 11                     | 12                     |
|--------|-------------------------|-----------------------|------------------------|-------------------------|-------------------------|------------------------|--------------------------|-------------------------|------------------------|---------------------------|------------------------|------------------------|
| A      | ABL1<br>1.21<br>OKAY    | AKT1<br>-1.00<br>OKAY | APC<br>-1.17<br>OKAY   | ATM<br>1.13<br>OKAY     | BAX<br>1.11<br>OKAY     | BCL2<br>1.14<br>OKAY   | BCL2L1<br>-1.01<br>OKAY  | BCR<br>-1.01<br>OKAY    | BRCA1<br>-1.12<br>OKAY | BRCA2<br>-1.57<br>OKAY    | CASP8<br>1.00<br>OKAY  | CCND1<br>-1.16<br>OKAY |
| B      | CDH1<br>-1.06<br>B      | CDK4<br>-1.01<br>OKAY | CDKN1A<br>1.25<br>OKAY | CDKN2A<br>-1.06<br>OKAY | CDKN2B<br>-1.18<br>OKAY | CDKN3<br>1.07<br>OKAY  | CTNNB1<br>1.05<br>OKAY   | E2F1<br>1.13<br>B       | EGF<br>-1.03<br>OKAY   | ELK1<br>-1.01<br>OKAY     | ERBB2<br>-1.21<br>OKAY | ESR1<br>-2.49<br>OKAY  |
| C      | ETS1<br>-1.06<br>OKAY   | FHIT<br>-1.17<br>OKAY | FOS<br>-1.21<br>OKAY   | FOXD3<br>-1.02<br>B     | HGF<br>1.36<br>B        | HIC1<br>-1.22<br>B     | HRAS<br>1.04<br>OKAY     | IGF2R<br>-1.12<br>OKAY  | JAK2<br>-1.02<br>OKAY  | JUN<br>-1.11<br>OKAY      | JUNB<br>1.02<br>OKAY   | JUND<br>-1.19<br>OKAY  |
| D      | KIT<br>-1.01<br>C       | KITLG<br>1.11<br>OKAY | KRAS<br>-1.14<br>OKAY  | MCL1<br>-1.18<br>OKAY   | MDM2<br>-1.07<br>OKAY   | MEN1<br>-1.12<br>OKAY  | MET<br>-1.13<br>OKAY     | MGMT<br>1.02<br>OKAY    | MLH1<br>-1.01<br>OKAY  | MOS<br>1.54<br>B          | MYB<br>1.03<br>OKAY    | MYC<br>1.09<br>OKAY    |
| E      | MYCN<br>1.22<br>OKAY    | NF1<br>-1.13<br>OKAY  | NF2<br>-1.17<br>OKAY   | NFKB1<br>-1.17<br>OKAY  | NFKB1A<br>-1.02<br>OKAY | NRAS<br>1.11<br>OKAY   | PIK3C2A<br>-1.08<br>OKAY | PIK3CA<br>-1.02<br>OKAY | PML<br>-1.05<br>OKAY   | PRKCA<br>1.01<br>OKAY     | RAF1<br>-1.01<br>OKAY  | RARA<br>-1.16<br>OKAY  |
| F      | RASSF1<br>-1.36<br>OKAY | RB1<br>-1.03<br>OKAY  | REL<br>-1.25<br>OKAY   | RET<br>1.60<br>B        | ROS1<br>-1.01<br>C      | RUNX1<br>-1.32<br>OKAY | RUNX3<br>-1.27<br>OKAY   | S100A4<br>1.11<br>OKAY  | SERPINB5<br>-1.91<br>B | SH3PXD2A<br>-1.65<br>OKAY | SMAD4<br>-1.06<br>OKAY | SRC<br>-1.20<br>OKAY   |
| G      | STAT3<br>-1.02<br>OKAY  | STK11<br>-1.43<br>B   | TGFB1<br>-1.01<br>OKAY | TNF<br>1.50<br>B        | TP53<br>-1.02<br>OKAY   | TP73<br>-1.05<br>B     | TSC1<br>-1.12<br>OKAY    | VHL<br>-1.18<br>OKAY    | WT1<br>-1.56<br>B      | WWOX<br>1.19<br>OKAY      | XRCC1<br>-1.07<br>OKAY | ZHX2<br>-1.14<br>OKAY  |

**Bel-7402**

# Cancer pathwayfinder

Visualization of log2(Fold Change)

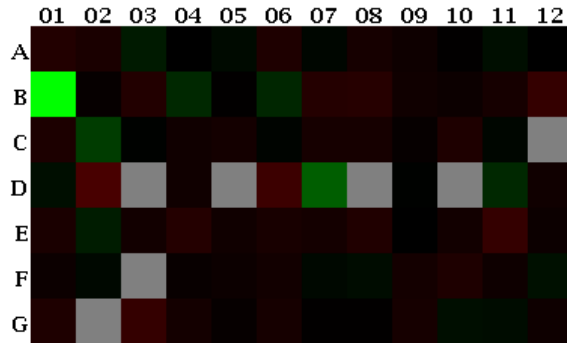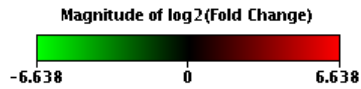

| Layout | 01                     | 02                        | 03                     | 04                       | 05                      | 06                     | 07                      | 08                     | 09                       | 10                      | 11                     | 12                     |
|--------|------------------------|---------------------------|------------------------|--------------------------|-------------------------|------------------------|-------------------------|------------------------|--------------------------|-------------------------|------------------------|------------------------|
| A      | ACLY<br>1.85<br>OKAY   | ACSL4<br>1.58<br>OKAY     | ADM<br>-1.60<br>OKAY   | ANGPT1<br>1.01<br>B      | ANGPT2<br>-1.21<br>B    | APAF1<br>1.69<br>OKAY  | ARNT<br>-1.13<br>OKAY   | ATP5A1<br>1.46<br>OKAY | AURKA<br>1.30<br>OKAY    | BCL2L11<br>1.05<br>OKAY | BIRC3<br>-1.27<br>OKAY | BMI1<br>1.02<br>OKAY   |
| B      | CA9<br>-99.57<br>A     | CASP2<br>1.12<br>OKAY     | CASP7<br>1.82<br>OKAY  | CASP9<br>-2.04<br>OKAY   | CCL2<br>1.05<br>B       | CCND2<br>-2.00<br>B    | CCND3<br>1.94<br>OKAY   | CDC20<br>1.98<br>OKAY  | CDH2<br>1.34<br>OKAY     | CFLAR<br>1.24<br>OKAY   | COX5A<br>1.50<br>OKAY  | CPT2<br>2.56<br>OKAY   |
| C      | DDB2<br>1.68<br>OKAY   | DDIT3<br>-2.90<br>OKAY    | DKC1<br>-1.04<br>OKAY  | DSP<br>1.33<br>OKAY      | E2F4<br>1.45<br>OKAY    | EPO<br>-1.07<br>B      | ERCC3<br>1.49<br>OKAY   | ERCC5<br>1.49<br>OKAY  | ETS2<br>1.10<br>OKAY     | FASLG<br>1.71<br>B      | FGF2<br>-1.10<br>OKAY  | FLT1<br>1.07<br>C      |
| D      | FOXC2<br>-1.30<br>OKAY | G6PD<br>3.65<br>OKAY      | GADD45G<br>1.07<br>C   | GPD2<br>1.35<br>OKAY     | GSC<br>1.07<br>C        | HMOX1<br>2.98<br>OKAY  | IGFBP3<br>-5.40<br>OKAY | IGFBP5<br>1.07<br>C    | IGFBP7<br>-1.05<br>OKAY  | KDR<br>1.07<br>C        | KRT14<br>-2.06<br>B    | LDHA<br>1.34<br>OKAY   |
| E      | LIG4<br>1.59<br>OKAY   | LPL<br>-1.67<br>B         | MAP2K1<br>1.36<br>OKAY | MAP2K3<br>1.94<br>OKAY   | MAPK14<br>1.34<br>OKAY  | MCM2<br>1.52<br>OKAY   | MKI67<br>1.43<br>OKAY   | NOL3<br>1.79<br>OKAY   | OCLN<br>-1.01<br>OKAY    | PFKL<br>1.37<br>OKAY    | PGF<br>2.52<br>OKAY    | PINX1<br>1.24<br>OKAY  |
| F      | POLB<br>1.26<br>OKAY   | PPP1R15A<br>-1.15<br>OKAY | SERPINB2<br>1.07<br>C  | SERPINF1<br>1.17<br>OKAY | SKP2<br>1.23<br>OKAY    | SLC2A1<br>1.37<br>OKAY | SNAI1<br>-1.13<br>OKAY  | SNAI2<br>-1.24<br>OKAY | SNAI3<br>1.46<br>OKAY    | SOD1<br>1.71<br>OKAY    | SOX10<br>1.27<br>B     | STMN1<br>-1.34<br>OKAY |
| G      | TBX2<br>1.74<br>B      | TEK<br>1.07<br>C          | TEP1<br>2.54<br>OKAY   | TERF1<br>1.42<br>OKAY    | TERF2IP<br>1.13<br>OKAY | TINF2<br>1.48<br>OKAY  | TNKS<br>1.04<br>OKAY    | TNKS2<br>1.02<br>OKAY  | UQCRRF51<br>1.49<br>OKAY | VEGFC<br>-1.31<br>OKAY  | WEE1<br>-1.23<br>OKAY  | XIAP<br>1.31<br>OKAY   |

MNK-45

Visualization of log2(Fold Change)

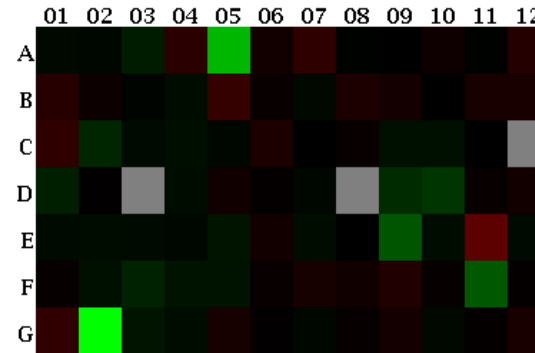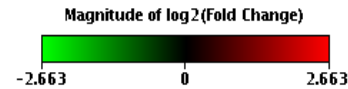

| Layout | 01                     | 02                        | 03                     | 04                        | 05                      | 06                     | 07                      | 08                      | 09                       | 10                      | 11                     | 12                     |
|--------|------------------------|---------------------------|------------------------|---------------------------|-------------------------|------------------------|-------------------------|-------------------------|--------------------------|-------------------------|------------------------|------------------------|
| A      | ACLY<br>-1.07<br>OKAY  | ACSL4<br>-1.04<br>OKAY    | ADM<br>-1.23<br>OKAY   | ANGPT1<br>1.35<br>B       | ANGPT2<br>-3.79<br>A    | APAF1<br>1.13<br>OKAY  | ARNT<br>1.40<br>OKAY    | ATP5A1<br>-1.01<br>OKAY | AURKA<br>-1.00<br>OKAY   | BCL2L11<br>1.10<br>OKAY | BIRC3<br>-1.02<br>OKAY | BMI1<br>1.30<br>OKAY   |
| B      | CA9<br>1.32<br>OKAY    | CASP2<br>1.09<br>OKAY     | CASP7<br>-1.02<br>OKAY | CASP9<br>-1.08<br>OKAY    | CCL2<br>1.47<br>B       | CCND2<br>1.06<br>A     | CCND3<br>-1.06<br>OKAY  | CDC20<br>1.22<br>OKAY   | CDH2<br>1.16<br>OKAY     | CFLAR<br>1.01<br>OKAY   | COX5A<br>1.20<br>OKAY  | CPT2<br>1.18<br>OKAY   |
| C      | DDB2<br>1.40<br>OKAY   | DDIT3<br>-1.32<br>OKAY    | DKC1<br>-1.08<br>OKAY  | DSP<br>-1.11<br>OKAY      | E2F4<br>-1.05<br>OKAY   | EPO<br>1.23<br>B       | ERCC3<br>-1.00<br>OKAY  | ERCC5<br>1.06<br>OKAY   | ETS2<br>-1.12<br>OKAY    | FASLG<br>-1.12<br>B     | FGF2<br>1.00<br>OKAY   | FLT1<br>-1.65<br>C     |
| D      | FOXC2<br>-1.24<br>OKAY | G6PD<br>1.02<br>OKAY      | GADD45G<br>-1.65<br>C  | GPD2<br>-1.10<br>OKAY     | GSC<br>1.12<br>B        | HMOX1<br>1.03<br>OKAY  | IGFBP3<br>-1.05<br>OKAY | IGFBP5<br>-1.65<br>C    | IGFBP7<br>-1.35<br>OKAY  | KDR<br>-1.46<br>B       | KRT14<br>1.07<br>B     | LDHA<br>1.13<br>OKAY   |
| E      | LIG4<br>-1.07<br>OKAY  | LPL<br>-1.09<br>OKAY      | MAP2K1<br>1.07<br>OKAY | MAP2K3<br>-1.05<br>OKAY   | MAPK14<br>1.14<br>OKAY  | MCM2<br>-1.09<br>OKAY  | MKI67<br>1.00<br>OKAY   | NOL3<br>-1.09<br>OKAY   | OCLN<br>-1.86<br>OKAY    | PFKL<br>-1.10<br>OKAY   | PGF<br>1.94<br>A       | PINX1<br>-1.08<br>OKAY |
| F      | POLB<br>1.05<br>OKAY   | PPP1R15A<br>-1.12<br>OKAY | SERPINB2<br>-1.28<br>B | SERPINF1<br>-1.14<br>OKAY | SKP2<br>-1.15<br>OKAY   | SLC2A1<br>1.07<br>OKAY | SNAI1<br>1.13<br>A      | SNAI2<br>1.17<br>OKAY   | SNAI3<br>1.26<br>OKAY    | SOD1<br>1.04<br>OKAY    | SOX10<br>-1.89<br>B    | STMN1<br>1.03<br>OKAY  |
| G      | TBX2<br>1.42<br>B      | TEK<br>-6.33<br>B         | TEP1<br>-1.16<br>OKAY  | TERF1<br>-1.09<br>OKAY    | TERF2IP<br>1.18<br>OKAY | TINF2<br>1.02<br>OKAY  | TNKS<br>-1.04<br>OKAY   | TNKS2<br>1.05<br>OKAY   | UQCRRF51<br>1.15<br>OKAY | VEGFC<br>-1.06<br>OKAY  | WEE1<br>1.02<br>OKAY   | XIAP<br>1.19<br>OKAY   |

Bel-7402
